1 **Title:**

2 Isolation of an archaeon at the prokaryote-eukaryote interface

3

4 **Authors:**

5 Hiroyuki Imachi<sup>1\*</sup>, Masaru K. Nobu<sup>2\*</sup>, Nozomi Nakahara<sup>1,3</sup>, Yuki Morono<sup>4</sup>, Miyuki  
6 Ogawara<sup>1</sup>, Yoshihiro Takaki<sup>1</sup>, Yoshinori Takano<sup>5</sup>, Katsuyuki Uematsu<sup>6</sup>, Tetsuro Ikuta<sup>7</sup>,  
7 Motoo Ito<sup>4</sup>, Yohei Matsui<sup>8</sup>, Masayuki Miyazaki<sup>1</sup>, Kazuyoshi Murata<sup>9</sup>, Yumi Saito<sup>1</sup>, Sanae  
8 Sakai<sup>1</sup>, Chihong Song<sup>9</sup>, Eiji Tasumi<sup>1</sup>, Yuko Yamanaka<sup>1</sup>, Takashi Yamaguchi<sup>3</sup>, Yoichi  
9 Kamagata<sup>2</sup>, Hideyuki Tamaki<sup>2</sup> and Ken Takai<sup>1</sup>

10

11 \*These authors contributed equally to this work.

12

13 **Affiliations:**

14 <sup>1</sup>Institute for Extra-cutting-edge Science and Technology Avant-garde Research (X-star),  
15 Japan Agency for Marine-Earth Science and Technology (JAMSTEC), Yokosuka, Japan

16 <sup>2</sup>Bioproduction Research Institute, National Institute of Advanced Industrial Science and  
17 Technology (AIST), Tsukuba, Japan

18 <sup>3</sup>Department of Civil and Environmental Engineering, Nagaoka University of  
19 Technology, Nagaoka, Japan

20 <sup>4</sup>Kochi Institute for Core Sample Research, X-star, JAMSTEC, Nankoku, Japan

21 <sup>5</sup>Biogeochemistry Program, Research Institute for Marine Resources Utilization,  
22 JAMSTEC, Yokosuka, Japan

23 <sup>6</sup>Department of Marine and Earth Sciences, Marine Work Japan Ltd, Yokosuka, Japan

24 <sup>7</sup>Research Institute for Global Change, JAMSTEC, Yokosuka, Japan

25 <sup>8</sup>Research Institute for Marine Resources Utilization, JAMSTEC, Yokosuka, Japan

26 <sup>9</sup>National Institute for Physiological Sciences, Okazaki, Japan

27

28 **Corresponding authors:**

29 Hiroyuki Imachi, E-mail: [imachi@jamstec.go.jp](mailto:imachi@jamstec.go.jp)

30 Masaru K. Nobu, E-mail: [m.nobu@aist.go.jp](mailto:m.nobu@aist.go.jp)

31

32

33

34 **Abstract**

35 The origin of eukaryotes remains enigmatic. Current data suggests that eukaryotes may  
36 have risen from an archaeal lineage known as “Asgard archaea”. Despite the eukaryote-  
37 like genomic features found in these archaea, the evolutionary transition from archaea to  
38 eukaryotes remains unclear due to the lack of cultured representatives and corresponding  
39 physiological insight. Here we report the decade-long isolation of a Lokiarchaeota-related  
40 Asgard archaeon from deep marine sediment. The archaeon, “*Candidatus*  
41 *Prometheoarchaeum syntrophicum* strain MK-D1”, is an anaerobic, extremely slow-  
42 growing, small cocci (~550 nm), that degrades amino acids through syntrophy. Although  
43 eukaryote-like intracellular complexities have been proposed for Asgard archaea, the  
44 isolate has no visible organelle-like structure. *Ca. P. syntrophicum* instead displays  
45 morphological complexity – unique long, and often, branching protrusions. Based on  
46 cultivation and genomics, we propose an “Entangle-Engulf-Enslave (E<sup>3</sup>) model” for  
47 eukaryogenesis through archaea-alphaproteobacteria symbiosis mediated by the physical  
48 complexities and metabolic dependency of the hosting archaeon.

49

50 How did the first eukaryotic cell emerge? So far, among various competing evolutionary  
51 models, the most widely accepted are the symbiogenetic models in which an archaeal  
52 host cell and an alphaproteobacterial endosymbiont merged to become the first eukaryotic  
53 cell<sup>1-4</sup>. Recent metagenomic discovery of Lokiarchaeota (and the Asgard archaea  
54 superphylum) led to the theory that eukaryotes originated from an archaeon closely  
55 related to Asgard archaea<sup>5,6</sup>. The Asgard archaea genomes encode a repertoire of proteins  
56 hitherto only found in *Eukarya* (eukaryotic signature proteins – ESPs), including those  
57 involved in membrane trafficking, vesicle formation/transportation, ubiquitin and  
58 cytoskeleton formation<sup>6</sup>. Subsequent metagenomic studies have suggested that Asgard  
59 archaea have a wide variety of physiological properties, including hydrogen-dependent  
60 anaerobic autotrophy<sup>7</sup>, peptide or short-chain hydrocarbon-dependent organotrophy<sup>8-11</sup>  
61 and rhodopsin-based phototrophy<sup>12,13</sup>. A recent study suggests that an ancient Asgard  
62 archaea degraded organic substances and syntrophically handed off reducing equivalents  
63 (*e.g.*, hydrogen and electrons) to a bacterial partner, and further proposes a symbiogenetic  
64 model for the origin of eukaryotes based on this interaction<sup>14</sup>. However, at present, no  
65 single representative of the Asgard archaea has been cultivated and, thus, the physiology  
66 and cell biology of this clade remains unclear. In an effort to close this knowledge gap,

67 we successfully isolated the first Asgard archaeon and here report the physiological  
68 characteristics, potentially key insights into the evolution of eukaryotes.

69

## 70 **Isolation of an Asgard archaeon**

71 Setting out to isolate uncultivated deep marine sediment microorganisms, we engineered  
72 and operated a methane-fed continuous-flow bioreactor system for over 2000 days to  
73 enrich such organisms from anaerobic marine methane-seep sediments<sup>15</sup> (Supplementary  
74 Text 1). We successfully enriched many phylogenetically diverse yet-to-be cultured  
75 microorganisms, including Asgard archaea members (Loki-, Heimdall- and  
76 Odinarchaeota)<sup>15</sup>. For further enrichment and isolation, sample of the bioreactor  
77 community was inoculated in glass tubes with simple substrates and basal media. After  
78 approximately one year, we found faint cell turbidity in a Casamino acids-fed culture  
79 supplemented with four bacteria-suppressing antibiotics (*i.e.*, ampicillin, kanamycin,  
80 streptomycin, and vancomycin; Supplementary Text 2) and incubated at 20°C. Clone  
81 library-based small subunit (SSU) rRNA gene analysis revealed a simple community  
82 containing many *Halodesulfovibrio* and, excitingly, a small population of Lokiarchaeota  
83 (Extended Data Table 1). In pursuit of this archaeon, named strain MK-D1, we repeated  
84 the subcultures at the time when MK-D1 cell yield was maximized by means of  
85 quantitative PCR (qPCR) monitoring. Repeated subcultures gradually enriched the  
86 archaeon with extremely slow growth rate and low cell yield (Fig. 1a). The culture  
87 consistently had a 30–60 days of lag phase and required over 3 months to reach full  
88 growth with a yield of  $\sim 10^5$  16S rRNA gene copies/ml (Fig. 1a). The doubling time was  
89 estimated to be approximately 14–25 days. Variation of cultivation temperatures  
90 (Extended Data Fig. 1), and substrate combinations and concentrations did not  
91 significantly improve the lag phase, growth rate or cell yield (data not shown), while the  
92 static cultivation supplemented with 20 amino acids (AAs) and powdered milk resulted  
93 in the stable growth. For further characterization, we cultured the archaeon under the  
94 optimal conditions determined above.

95 After six transfers, MK-D1 reached 13% abundance in a tri-culture containing  
96 *Halodesulfovibrio* (85%) and *Methanogenium* (2%) (Extended Data Table 1).  
97 Fluorescence *in situ* hybridization (FISH) and scanning electron microscopic (SEM)  
98 observation revealed close physical association of the archaeon with the other  
99 microorganisms (Figs. 1b–e, Extended Data Fig. 2). Through metagenome-based

100 exploration of this archaeon’s metabolic potential and stable isotope probing experiment,  
101 we discovered that MK-D1 can catabolize some AAs and peptides through syntrophic  
102 growth with *Halodesulfovibrio* and *Methanogenium* via interspecies hydrogen (and/or  
103 formate) transfer (Fig. 2 and Supplementary Table S1 and Fig. S1, details in latter  
104 section)<sup>16</sup>. Indeed, addition of hydrogen scavenger-inhibiting compounds (*i.e.*, 10 mM  
105 molybdate and 10 mM 2-bromoethanesulfonate for sulfate-reducing *Halodesulfovibrio*  
106 and methanogenic *Methanogenium*, respectively) significantly impeded growth of MK-  
107 D1. Through subsequent transfers, we were able to eliminate the *Halodesulfovibrio*  
108 population, allowing us to obtain a pure co-culture of the archaeon and *Methanogenium*  
109 after a twelve-year journey – starting from deep-sea sediments to a bioreactor-based “pre-  
110 enrichment” and a final seven-year *in vitro* enrichment. We here propose the name  
111 “*Candidatus* Prometheoarchaeum syntrophicum strain MK-D1” for the isolated  
112 Lokiarchaeon.

113

#### 114 **Cell biology and physiology of MK-D1**

115 We further characterized strain MK-D1 using the highly purified cultures and pure co-  
116 cultures. Microscopic observations showed that the cells are small cocci, ca. 300-750 nm  
117 in diameter (average 550 nm, n=15), and generally form aggregates surrounded with  
118 extracellular polysaccharide (EPS)-like materials (Fig. 3a, b and Extended Data Fig. 2),  
119 consistent with previous observations using FISH<sup>15,17</sup>. Dividing cells had less EPS-like  
120 materials and a ring-like structure around the middle of cells (Fig. 3c and Extended Data  
121 Fig. 2). Cryo-electron and transmission electron microscopic observations revealed that  
122 the cells contain no visible organelle-like inclusions (Fig. 3d–f, Extended Data Fig. 2 and  
123 Supplementary Movies S1–S3). The cells produce membrane vesicles (MVs; 50–280 nm  
124 in diameter) (Fig. 3d–f and Extended Data Fig. 2) and chains of blebs (Fig. 3c and  
125 Extended Data Fig. 2e). The cells also form unique membrane-based protrusions with a  
126 diameter of about 80–100 nm and various lengths (Fig. 3g–i and Extended Data Fig. 2).  
127 Some protrusions remarkably display complex branching, unlike known archaeal  
128 protrusions<sup>18</sup>. These protrusions were especially abundant after late exponential growth  
129 phase. Lipid composition analysis of the MK-D1 and *Methanogenium* co-culture revealed  
130 typical archaeal signatures – a C<sub>20</sub>-phytane and C<sub>40</sub>-biphytanes (BPs) with 0–2  
131 cyclopentane rings (Fig. 3j). Considering the lipid data obtained from a reference

132 *Methanogenium* isolate (99.3% 16S rRNA gene identity; Supplementary Fig. S3), MK-  
133 D1 probably contains C<sub>20</sub>-phytane and C<sub>40</sub>-BPs with 0–2 rings.

134 MK-D1 can degrade AAs anaerobically, as confirmed by monitoring AAs depletion  
135 during the growth of pure co-cultures (Extended Data Fig. 3). We further verify AA  
136 utilization by quantifying the uptake of a mixture of <sup>13</sup>C- and <sup>15</sup>N-labeled AAs through  
137 nanometer-scale secondary ion mass spectrometry (NanoSIMS) (Fig. 2b–e). Cell  
138 aggregates of MK-D1 incorporated more nitrogen than carbon, suggesting that the  
139 possible mixotrophy. Interestingly, the <sup>13</sup>C-labeling of methane and carbon dioxide varied  
140 depending on the methanogenic partner, indicating that MK-D1 produces both hydrogen  
141 and formate from AAs for interspecies electron transfer (Extended Data Table 2, see later  
142 section). Indeed, addition of high concentrations of hydrogen or formate completely  
143 suppressed growth of MK-D1 (Extended Data Table 3). The syntrophic partner was  
144 replaceable – MK-D1 could also grow syntrophically with *Methanobacterium* sp. strain  
145 MO-MB1<sup>19</sup> instead of *Methanogenium*, which was originally co-enriched with MK-D1  
146 (Fig. 2b–e). Although 14 different culture conditions were applied, none of substances  
147 (e.g., sugars, electron acceptors, and cell building blocks) enhanced the cell yield,  
148 implying specialization to degradation of AAs or peptides (Extended Data Table 3).

149 **Etymology.** *Prometheoarchaeum*, *Prometheus* (Greek): a Greek god who shaped man  
150 out of mud and gave them the ability to create fire; *archaeum* from *archaea* (Greek): an  
151 ancient life. The genus name is an analogy between this organism's evolutionary  
152 relationship with the origin of eukaryotes and the involvement of Prometheus in man's  
153 origin from sediments and acquisition of an unprecedented oxygen-driven energy-  
154 harnessing ability. The species name, *syntrophicum*, *syn* (Greek): together with; *trephein*  
155 (Greek) nourish; *icus* (Latin) pertaining to. The species name referred to syntrophic  
156 substrate utilization property of this strain.

157 **Locality.** Isolated from deep-sea methane seep sediment of the Nankai Trough at 2533 m  
158 water depth, off Kumano area, Japan.

159 **Diagnosis.** Anaerobic, AA-oxidizing archaeon, small cocci, ca. 550 nm in diameter,  
160 syntrophically grows with hydrogen- and formate-utilizing microorganisms. It produces  
161 MVs, chains of blebs, and membrane-based protrusions.

162  
163  
164

## 165 **Reconstruction of extant and ancestral features**

166 MK-D1 encodes genes for degradation of 10 AAs and reductive generation of H<sub>2</sub> and  
167 formate for electron disposal. Most of the identified AA-catabolizing pathways only  
168 recover energy through degradation of a 2-oxoacid intermediate (*i.e.*, pyruvate or 2-  
169 oxobutyrate; Fig. 2a). MK-D1 can degrade 2-oxoacids hydrolytically (2-oxoacid--  
170 formate lyases) or oxidatively (2-oxoacid:ferredoxin oxidoreductases) to yield acyl-CoA  
171 intermediates that can be further hydrolyzed for ATP generation. The hydrolytic and  
172 oxidative paths release the AA carboxylate group as formate and CO<sub>2</sub> respectively. For  
173 the former, formate can be directly handed off to a partnering methanogenic archaea or  
174 sulfate-reducing bacteria (SRB). For the latter, reduced ferredoxin generated from 2-  
175 oxoacid oxidation can drive reduction of H<sup>+</sup> to H<sub>2</sub> (electron-confurcating NiFe  
176 hydrogenase MvhADG-HdrABC) or CO<sub>2</sub> to formate (formate dehydrogenase FdhA) for  
177 interspecies electron transfer. This suggests that MK-D1 has two approaches for  
178 syntrophic interaction. A <sup>13</sup>C-AA-fed co-culture of MK-D1 with *Methanobacterium*  
179 generated <sup>13</sup>C-enriched CH<sub>4</sub> (Extended Data Table 2), indicating syntrophy mediated by  
180 the hydrolytic path (*i.e.*, AA-derived <sup>13</sup>C-formate transferred to partner, oxidized to <sup>13</sup>CO<sub>2</sub>,  
181 and further reduced to <sup>13</sup>CH<sub>4</sub>). On the other hand, a <sup>13</sup>C-AA-fed tri-culture of MK-D1  
182 with *Halodesulfobivrio* and *Methanogenium* generated <sup>13</sup>C-enriched CO<sub>2</sub>, suggesting the  
183 oxidative path (*i.e.*, AA-derived <sup>13</sup>CO<sub>2</sub> released and mixed with <sup>12</sup>C-bicarbonate pool in  
184 mineral medium). Thus, we confirm that MK-D1 can switch between syntrophic  
185 interaction via 2-oxoacid hydrolysis and oxidation depending on the partner(s).

186 The evolutionary relationship between archaea and eukaryotes has been under debate,  
187 hinging on the incompleteness and contamination associated with metagenome-derived  
188 genomes and variation in results depending on tree construction protocols<sup>20-23</sup>. By  
189 isolating strain MK-D1, we were able to obtain a closed genome (Supplementary Table  
190 S1 and Fig. S1) and construct a ribosomal protein-based phylogenomic tree that shows  
191 clear phylogenetic sistering between MK-D1 and *Eukarya* (Fig. 4a and Supplementary  
192 Tables S4 and S5, and Fig. S4). Thus, strain MK-D1 represents the closest cultured  
193 archaeal relative of eukaryotes. We confirmed the presence of many ESPs identified in  
194 related Asgard archaea (Supplementary Fig. S5) and obtained the first RNA-based  
195 evidence for expression of such genes (Supplementary Table S6).

196 Given the phylogenetic relationship of MK-D1, other Asgard archaea, and eukaryotes,  
197 estimating the physiological traits of the last Asgard archaea common ancestor is of

198 utmost importance. Comparative genomics of MK-D1 and published metagenome-  
199 assembled genomes of Asgard archaea revealed that most of the members encode AA-  
200 catabolizing pathways, reversible NiFe hydrogenases (MvhADG-HdrABC<sup>24</sup> and/or  
201 HydAD<sup>25</sup>) (Fig. 4b), and restricted biosynthetic capacities (*i.e.*, AA and vitamin  
202 synthesis; Extended Data Fig. 4), indicating H<sub>2</sub>-evolving AA degradation and partner  
203 dependence may be a common feature across the superphylum. Like MK-D1, other  
204 Asgard archaea members of Lokiarchaeota, Helarchaeota, and Heimdallarchaeota may  
205 be capable of syntrophic AA degradation given that they encode an electron transfer  
206 complex FlxABCD-HdrABC associated with syntrophic bacteria<sup>26</sup> or formate  
207 dehydrogenases. Many lineages also possess genes for alternative electron disposal  
208 through fermentation – *i.e.*, reduction of pyruvate and acetyl-CoA to propionate and  
209 butyrate correspondingly (see Fig. 4b for details). Many lineages also encode the potential  
210 for other metabolisms – mono/tri-methylamine-driven homoacetogenesis and coupled  
211 H<sub>2</sub>/S<sup>0</sup> metabolism in Thorarchaeota; H<sub>2</sub>S metabolism in Heimdallarchaeota; and, as  
212 pointed out by pioneering studies, Wood-Ljungdahl pathway in several genomes<sup>7,8,10,14</sup>;  
213 alkane metabolism in Helarchaeota<sup>11</sup>; and aerobic respiration in Heimdallarchaeota<sup>6</sup>.  
214 Although these metabolisms are highly unique and ecologically important, they are either  
215 only sporadically present or confined to specific phylum-level lineages. To identify  
216 potentially ancestral features, we searched for catabolic genes conserved across phylum-  
217 level lineages including Heimdallarchaeota (the most deep-branching Asgard archaea)  
218 that form monophyletic clusters in phylogenetic analyses. We found key catabolic genes  
219 for serine, threonine, and histidine degradation (serine/threonine dehydratase and  
220 urocanate hydratase; Supplementary Figs. S6 and S7), butyrate fermentation (3-ketoacyl-  
221 CoA thiolase and fatty-acid--CoA ligase; Supplementary Figs. S8 and S9), and propionate  
222 fermentation (succinate dehydrogenase flavoprotein subunit, methylmalonyl-CoA  
223 transcarboxylase-associated biotin ligase, and biotin carboxyl carrier protein;  
224 Supplementary Figs. S10–S12). Given the physiology of the isolated MK-D1, presence  
225 of AA catabolism, H<sub>2</sub> metabolism, and lack of biosynthetic pathways in nearly all extant  
226 Asgard archaea lineages, and conservation of the above metabolisms, we propose that the  
227 last Asgard archaea common ancestor was an AA-degrading anaerobe producing H<sub>2</sub> and  
228 fatty acids as byproducts that acquired ATP primarily from substrate-level  
229 phosphorylation from catabolizing 2-oxoacid intermediates and depended on metabolic  
230 partners, though we do not reject the possibility of other additional lifestyles.

## 231 **Proposal of new eukaryogenesis model**

232 We demonstrate that Asgard archaea are capable of syntrophic AA degradation and  
233 identify related metabolic features conserved across the superphylum. This provides  
234 tangible evidence for the recent proposal that the ancestral Asgard archaeon was a  
235 syntrophic organotroph based on the prevalence of NiFe hydrogenases and  
236 hydrogenogenic organotrophy across the superphylum<sup>14</sup>. In Earth's early ocean, partners  
237 were likely methanogenic archaea rather than SRB due to low ocean sulfate  
238 concentrations prior to the Great Oxidation Event (G.O.E.; 2.7 Ga~)<sup>27</sup> (Fig. 5a). As the  
239 ocean and atmosphere became oxygenated, marine sulfate concentrations rose<sup>28</sup> and  
240 syntrophy likely shifted to interaction with SRB as observed in this study, which is more  
241 thermodynamically favorable<sup>29</sup>. During the G.O.E., cyanobacterial activity (and  
242 concomitant marine organic matter production) increased, leading to transfer of excess  
243 organic matter from the photic zone to marine sediments<sup>30,31</sup>. The ancient anaerobic  
244 Asgard archaea could have taken one of two paths for survival and adaptation: to remain  
245 confined in strictly anaerobic habitats or to advance towards the anoxic-oxic interface  
246 with greater substrate and "energy" availability. The archaeon at the last Archaea-  
247 Eukarya division (*i.e.*, Heimdallarchaeota-Eukarya ancestor) likely preferentially grew  
248 closer to the sulfate- and organics-rich anoxic-oxic interface environments (SRB could  
249 have continued syntrophic interaction at the anoxic-oxic interface as many extant SRB  
250 are aerotolerant and can perform sulfate reduction in the presence of O<sub>2</sub><sup>32</sup>). However, to  
251 further adapt to higher O<sub>2</sub> concentrations and also compete with facultatively aerobic  
252 organotrophs, acquisition of the capacity for O<sub>2</sub> utilization would have been necessary.

253 Two routes may be possible: acquisition of aerobic respiration (*i.e.*, electron transport  
254 chain and terminal oxidases) or an O<sub>2</sub>-utilizing endosymbiont. We hypothesize that the  
255 ancestral Heimdallarchaeon (or a specific sub-lineage) adopted the former route (Fig. 4b)  
256 and the pre-last eukaryotic common ancestor (LECA) archaeon took the latter. Prior to  
257 endosymbiosis, the pre-LECA archaeon likely interacted with SRB and O<sub>2</sub>-utilizing  
258 organotrophs, who maintained the local habitats O<sub>2</sub> concentrations low (Fig. 5b). The O<sub>2</sub>-  
259 utilizing partner was likely a facultative aerobe capable of aerobic and anaerobic H<sub>2</sub>-  
260 generating organotrophy. In this three-member interaction, the SRB could syntrophically  
261 scavenge H<sub>2</sub> from both the pre-LECA archaeon and facultatively aerobic partner. The  
262 dynamic oxic-anoxic-adaptable symbiosis could have strengthened the three-member  
263 interaction and physical association. Moreover, the pre-LECA archaeon is predicted to



264 lack many biosynthetic pathways (Extended Data Fig. 4) and, thus, would have still  
265 depended on metabolite exchange with partners for growth. One of the facultatively  
266 aerobic partners was likely the pre-mitochondrial alphaproteobacterium (PA; *i.e.*, future  
267 mitochondrion) as it has been proposed that PA would be capable of aerobic and  
268 anaerobic H<sub>2</sub>-generating organotrophy<sup>4</sup>. Evolution of the symbiosis likely led to PA  
269 endosymbiosis into the pre-LECA archaeon, resulting in a transitional PA-containing pre-  
270 LECA archaeon (PAPLA) using PA as an O<sub>2</sub>-scavenging and building-block-providing  
271 symbiont essential for growth under microaerobic conditions even without SRB.

272 Note that it is entirely possible for the H<sub>2</sub>-consuming partner to have become  
273 endosymbionts of the pre-LECA archaeon as proposed previously<sup>14,33</sup>. However, H<sub>2</sub>-  
274 consuming partners would have had less advantage as endosymbionts. H<sub>2</sub> consumers  
275 would prefer higher H<sub>2</sub> concentrations, but an enlarged host would require larger amounts  
276 of substrate to accumulate H<sub>2</sub> compared to a small prokaryotic H<sub>2</sub> producers with  
277 concentrated H<sub>2</sub> generation. Moreover, H<sub>2</sub> is membrane-permeable, so there is little  
278 benefit to being inside an H<sub>2</sub> producer. Thus, endosymbiosis of an H<sub>2</sub> utilizer is  
279 unfavorable without uncompartimentalized H<sub>2</sub> generation and unlikely to have stabilized.  
280 In fact, extant methanogenic endosymbionts are observed only in hydrogenosome-  
281 possessing protozoa<sup>34</sup>.

282 How did the endosymbiosis physically manifest? Given the structure of extant  
283 eukaryotic cells, it is logical to presume that the pre-LECA archaeon engulfed their  
284 metabolic partner. Although a phagocytosis-like process has been previously proposed<sup>6</sup>,  
285 (i) the observed MK-D1 cells are much too small to engulf their metabolic partner in this  
286 way, (ii) Asgard archaea lack phagocytotic machinery<sup>35</sup>, and (iii) a pre-mitochondriate  
287 organism lacks sufficient energy to perform phagocytosis<sup>36</sup>. Based on the observation of  
288 unusual morphological structures of MK-D1 cells (Fig. 3 and Extended Data Fig. 2), the  
289 pre-LECA Asgard archaeon may have produced protrusions and/or MVs (Fig. 5b). For  
290 an archaeon syntrophically growing in a narrow space (*e.g.*, sediment pore), it may have  
291 been possible for the protrusions/MVs to fuse and inadvertently surround its partner,  
292 resulting in phagocytosis-independent engulfment (Fig. 5c). There are many possible  
293 triggers for membrane fusion, including mechanical stress, electric current, or even  
294 evolution of membrane-fusing proteins (*e.g.*, SNARE)<sup>37</sup>. Unlike phagocytosis, such a  
295 process would assimilate the partner and simultaneously form a chromosome-bounding

296 membrane structure topologically similar to that of the eukaryotic nuclear membrane (Fig.  
297 5d), a scheme similar to the “Inside-out model” presented by Baum and Baum (2014)<sup>38</sup>.

298 PAPLA likely shared 2-oxoacids with the endosymbiotic PA, given that AA-  
299 degrading pathways widely encoded by Asgard archaea primarily recover ATP from 2-  
300 oxoacid degradation (*i.e.*, 2-oxoacid oxidation and acyl-CoA hydrolysis; Figs. 4b and 5d).  
301 Under anaerobic conditions, PAPLA and PA may have shared AA-derived 2-oxoacids  
302 and both produced H<sub>2</sub> for syntrophic interaction with SRB. Conversely, when exposed to  
303 microaerobic conditions, PAPLA likely catabolized AA in syntrophy with SRB but also  
304 provided 2-oxacids to PA and stimulate O<sub>2</sub> consumption. PAPLA could have  
305 theoretically absorbed the endosymbiotic PA’s metabolic capacity to become a more  
306 metabolically versatile unicellular organism; however, maintaining a respiratory  
307 endosymbiont was likely beneficial because the high surface-area-to-volume ratio of  
308 endosymbiotic (smaller) cells can maximize electron-driven energy synthesis (*i.e.*,  
309 oxidative phosphorylation), which is kinetically limited by membrane surface area.  
310 Moreover, the O<sub>2</sub>-consuming symbiont could theoretically produce large amounts of  
311 energy for biosynthesis and allow the host PAPLA access to an intracellular pool of  
312 biological building blocks (*e.g.*, cofactors) without the need for active transport by  
313 PAPLA itself.

314 To mature the endosymbiosis, streamlining of metabolic processes is paramount.  
315 Two major redundancies are lipid biosynthesis and 2-oxoacid-driven ATP generation. As  
316 the hosting PAPLA had ether-type lipids (as evidenced by MK-D1; Fig. 3j) and PA likely  
317 had ester-type, two lipid types coexisted in the hybrid cell (Fig. 5d). As horizontal gene  
318 transfer between the host and symbiont (or potentially other bacterial source) proceeded,  
319 PAPLA likely lost synthesis of ether-type lipids and acquired that of ester-type to resolve  
320 redundancy (*i.e.*, streamline genome) in lipid biosynthesis, and passively exchanged the  
321 ether-type lipids with ester-type through dilution via cell division (lipid types can mix  
322 without compromising structure/fluidity<sup>39</sup>). Combining the engulfment described above  
323 and this lipid exchange, we reach a PAPLA with single-layered ester-type lipid plasma  
324 and nuclear membranes, which is consistent with extant eukaryotes (Fig. 5e).

325 Although PAPLA and PA initially shared 2-oxoacids, to streamline, this symbiosis  
326 must transition towards delegation of this catabolism to one side and sharing of the  
327 generated ATP. For maximizing aerobic oxidative phosphorylation, it is reasonable for  
328 PA to catabolize 2-oxoacids, generate ATP, and transport ATP to the host cytosol. This

329 is analogous to the symbiosis between extant eukaryotes and their mitochondria (or  
330 hydrogenosomes) and, thus, evolution of the ATP transporter (*i.e.*, ADP/ATP carrier or  
331 AAC) was a major factor in fixing the symbiosis<sup>40</sup>. However, it is unrealistic to think that  
332 ATP-providing machinery evolved altruistically. We hypothesize that PA first developed  
333 AAC as a parasitic tool to absorb host-synthesized ATP, as in extant pathogenic *Rickettsia*  
334 and *Chlamydiae*<sup>41</sup> (Fig. 5e). To combat this parasitism, PAPLA could have evolved to (i)  
335 lose pyruvate (and other 2-oxoacids) catabolism, then (ii) delegate 2-oxoacid degradation  
336 and ATP synthesis to PA, (iii) generate an ATP concentration gradient from PA to the  
337 cytosol, and ultimately (iv) reverse the direction of AAC activity<sup>41</sup> (Fig. 5f). For PAPLA  
338 to evolve towards retaining both aerobic and anaerobic metabolism, the progression  
339 above is critical because PAPLA-PA symbiosis would have heavily leaned towards  
340 parasitism under anaerobic conditions (*i.e.*, taking both 2-oxoacids and ATP and ATP  
341 with little to no return). On the other hand, adaptation to aerobic conditions through loss  
342 of O<sub>2</sub>-sensitive ferredoxin-dependent 2-oxoacid metabolism (*e.g.*, pyruvate:ferredoxin  
343 oxidoreductase) and consequent delegation of 2-oxoacid-degrading ATP generation to  
344 PA (via 2-oxoacid dehydrogenases) would have allowed evolution towards aerobiosis. In  
345 this symbiosis, PAPLA and PA mutually benefit – PAPLA can allot energy metabolism  
346 to PA and indirectly obtain energy from organotrophy via AAC while PA is fed 2-  
347 oxoacids for energy production (Fig. 5f). Here, PAPLA enslaves PA and we arrive at  
348 LECA possessing symbiosis congruent with that of extant eukaryotes and their  
349 mitochondria.

350 In summary, we obtained the first isolate of Asgard archaea with unique metabolic  
351 and morphological features through a total of 12 years cultivation, and combining these  
352 observations with genomic analyses, propose the “Entangle-Engulf-Enslave (E<sup>3</sup>) model”  
353 for eukaryogenesis from archaea. Maturation of this model requires elucidation and  
354 incorporation of the timing/progression of lateral gene transfer between PAPLA and PA  
355 or other bacteria, PA simplification and organellogenesis towards the first mitochondrion,  
356 cell complexification (*e.g.*, non-mitochondrial organelle development), and elaboration  
357 of eukaryotic cell division and their ties with Earth’s history. Endeavors in cultivation of  
358 other Asgard archaea and more deep-branching eukaryotes are essential to further unveil  
359 the road from archaea to eukaryotes.

360  
361

362 **References**

- 363 1. Embley, T. M. & Martin, W. Eukaryotic evolution, changes and challenges. *Nature*  
364 **440**, 623–630 (2006).
- 365 2. López-García, P. & Moreira, D. Open questions on the origin of eukaryotes.  
366 *Trends Ecol. Evol.* **30**, 697–708 (2015).
- 367 3. Koonin, E. V. Origin of eukaryotes from within archaea, archaeal eukaryome and  
368 bursts of gene gain: eukaryogenesis just made easier? *Phil. Trans. R. Soc. Lond. B*  
369 **370**, 20140333 (2015).
- 370 4. Martin, W. F., Garg, S. & Zimorski, V. Endosymbiotic theories for eukaryote  
371 origin. *Phil. Trans. R. Soc. Lond. B* **370**, 20140330 (2015).
- 372 5. Spang, A. *et al.* Complex archaea that bridge the gap between prokaryotes and  
373 eukaryotes. *Nature* **521**, 173–179 (2015).
- 374 6. Zaremba-Niedzwiedzka, K. *et al.* Asgard archaea illuminate the origin of  
375 eukaryotic cellular complexity. *Nature* **541**, 353–358 (2017).
- 376 7. Sousa, F. L., Neukirchen, S., Allen, J. F., Lane, N. & Martin, W. F. Lokiarchaeon  
377 is hydrogen dependent. *Nat. Microbiol.* **1**, 16034 (2016).
- 378 8. Seitz, K. W., Lazar, C. S., Hinrichs, K.-U., Teske, A. P. & Baker, B. J. Genomic  
379 reconstruction of a novel, deeply branched sediment archaeal phylum with  
380 pathways for acetogenesis and sulfur reduction. *ISME J.* **10**, 1696–1705 (2016).
- 381 9. Dombrowski, N., Teske, A. P. & Baker, B. J. Expansive microbial metabolic  
382 versatility and biodiversity in dynamic Guaymas Basin hydrothermal sediments.  
383 *Nat. Commun.* **9**, 4999 (2018).
- 384 10. Liu, Y. *et al.* Comparative genomic inference suggests mixotrophic lifestyle for  
385 Thorarchaeota. *ISME J.* **12**, 1021–1031 (2018).
- 386 11. Seitz, K. W. *et al.* Asgard archaea capable of anaerobic hydrocarbon cycling. *Nat.*  
387 *Commun.* **10**, 1822 (2019).
- 388 12. Pushkarev, A. *et al.* A distinct abundant group of microbial rhodopsins discovered  
389 using functional metagenomics. *Nature* **558**, 595–599 (2018).
- 390 13. Bulzu, P.-A. *et al.* Casting light on Asgardarchaeota metabolism in a sunlit  
391 microoxic niche. *Nat. Microbiol.* **105**, 20356 (2019).
- 392 14. Spang, A. *et al.* Proposal of the reverse flow model for the origin of the eukaryotic  
393 cell based on comparative analyses of Asgard archaeal metabolism. *Nat. Microbiol.*  
394 **4**, 1138–1148 (2019).

- 395 15. Aoki, M. *et al.* A long-term cultivation of an anaerobic methane-oxidizing  
396 microbial community from deep-sea methane-seep sediment using a continuous-  
397 flow bioreactor. *PLoS ONE* **9**, e105356 (2014).
- 398 16. Schink, B. & Stams, A. J. *Syntrophism Among Prokaryotes in The Prokaryotes*  
399 (eds. Rosenberg, E., DeLong, E. F., Lory, S., Stackebrandt, E. & Thompson, F.)  
400 471–493 (Springer Berlin Heidelberg, 2013).
- 401 17. Knittel, K., Lösekann, T., Boetius, A., Kort, R. & Amann, R. Diversity and  
402 distribution of methanotrophic archaea at cold seeps. *Appl. Environ. Microbiol.* **71**,  
403 467–479 (2005).
- 404 18. Marguet, E. *et al.* Membrane vesicles, nanopods and/or nanotubes produced by  
405 hyperthermophilic archaea of the genus *Thermococcus*. *Biochem. Soc. Trans.* **41**,  
406 436–442 (2013).
- 407 19. Imachi, H. *et al.* Cultivation of methanogenic community from subseafloor  
408 sediments using a continuous-flow bioreactor. *ISME J.* **5**, 1913–1925 (2011).
- 409 20. Da Cunha, V., Gaia, M., Gabelle, D., Nasir, A. & Forterre, P. Lokiarchaea are close  
410 relatives of Euryarchaeota, not bridging the gap between prokaryotes and  
411 eukaryotes. *PLoS Genet.* **13**, e1006810 (2017).
- 412 21. Da Cunha, V., Gaia, M., Nasir, A. & Forterre, P. Asgard archaea do not close the  
413 debate about the universal tree of life topology. *PLoS Genet.* **14**, e1007215 (2018).
- 414 22. Spang, A. *et al.* Asgard archaea are the closest prokaryotic relatives of eukaryotes.  
415 *PLoS Genet.* **14**, e1007080 (2018).
- 416 23. Brunk, C. F. & Martin, W. F. Archaeal histone contributions to the origin of  
417 eukaryotes. *Trends Microbiol.* **27**, 703–714 (2019).
- 418 24. Buckel, W. & Thauer, R. K. Energy conservation via electron bifurcating  
419 ferredoxin reduction and proton/Na<sup>+</sup> translocating ferredoxin oxidation. *Biochim.*  
420 *Biophys. Acta* **1827**, 94–113 (2013).
- 421 25. Ma, K., Zhou, H. Z. & Adams, M. W. Hydrogen production from pyruvate by  
422 enzymes purified from the hyperthermophilic archaeon, *Pyrococcus furiosus*: A  
423 key role for NADPH. *FEMS Microbiol. Lett.* **122**, 245–250 (1994).
- 424 26. Nobu, M. K. *et al.* The genome of *Syntrophorhabdus aromaticivorans* strain UI  
425 provides new insights for syntrophic aromatic compound metabolism and electron  
426 flow. *Environ. Microbiol.* **17**, 4861–4872 (2015).
- 427 27. Canfield, D. E., Habicht, K. S. & Thamdrup, B. The Archean sulfur cycle and the

- 428 early history of atmospheric oxygen. *Science* **288**, 658–661 (2000).
- 429 28. Luo, G. *et al.* Rapid oxygenation of Earth’s atmosphere 2.33 billion years ago. *Sci.*  
430 *Adv.* **2**, e1600134 (2016).
- 431 29. Valentine, D. L. *Thermodynamic Ecology of Hydrogen-based Syntrophy in*  
432 *Symbiosis. Cellular Origin, Life in Extreme Habitats and Astrobiology*, (ed.  
433 Seckbach, J.) **4**, 147–161 (Springer, Dordrecht, 2001).
- 434 30. Kump, L. R. *et al.* Isotopic evidence for massive oxidation of organic matter  
435 following the Great Oxidation Event. *Science* **334**, 1694–1696 (2011).
- 436 31. Gumsley, A. P. *et al.* Timing and tempo of the Great Oxidation Event. *Proc. Natl.*  
437 *Acad. Sci. USA* **114**, 1811–1816 (2017).
- 438 32. Cypionka, H. Oxygen respiration by *Desulfovibrio* species. *Annu. Rev. Microbiol.*  
439 **54**, 827–848 (2000).
- 440 33. López-García, P. & Moreira, D. Selective forces for the origin of the eukaryotic  
441 nucleus. *BioEssays* **28**, 525–533 (2006).
- 442 34. *(Endo)symbiotic Methanogenic Archaea*. (ed. Hackstein, J. H. P.) (Springer, 2018).
- 443 35. Burns, J. A., Pittis, A. A. & Kim, E. Gene-based predictive models of trophic  
444 modes suggest Asgard archaea are not phagocytotic. *Nat. Ecol. Evol.* **2**, 697–704  
445 (2018).
- 446 36. Martin, W. F., Tielens, A. G. M., Mentel, M., Garg, S. G. & Gould, S. B. The  
447 physiology of phagocytosis in the context of mitochondrial origin. *Microbiol. Mol.*  
448 *Biol. Rev.* **81**, e00008–17 (2017).
- 449 37. Cevc, G. & Richardsen, H. Lipid vesicles and membrane fusion. *Adv. Drug Deliv.*  
450 *Rev.* **38**, 207–232 (1999).
- 451 38. Baum, D. A. & Baum, B. An inside-out origin for the eukaryotic cell. *BMC Biol.*  
452 **12**, 76 (2014).
- 453 39. Batenjany, M. M., O’Leary, T. J., Levin, I. W. & Mason, J. T. Packing  
454 characteristics of two-component bilayers composed of ester- and ether-linked  
455 phospholipids. *Biophys. J.* **72**, 1695–1700 (1997).
- 456 40. Gray, M. W. The pre-endosymbiont hypothesis: a new perspective on the origin  
457 and evolution of mitochondria. *Cold Spring Harb. Perspect. Biol.* **6**, a016097  
458 (2014).
- 459 41. Winkler, H. H. & Neuhaus, H. E. Non-mitochondrial ATP transport. *Trends*  
460 *Biochem. Sci.* **24**, 64–68 (1999).

461 **Supplementary Information** is available in the online version of the paper.

462

463 **Acknowledgements** We thank Hiroyuki Ohno and Tsuyoshi Yamaguchi for assistance  
464 with HCR-FISH analysis, Takeshi Terada for help of NanoSIMS sample preparation,  
465 Masami Isozaki for assistance with cultivation experiments, Takaaki Kubota for  
466 assistance with chemical analysis, Kiyotaka Takishita, Akinori Yabuki, Takashi Shiratori,  
467 Akiyoshi Ohashi, Fumio Inagaki, Takuro Nunora, Shinsuke Kawagucci, Takazo Shibuya,  
468 Shun'ichi Ishii, Yusuke Tsukatani and Yutetsu Kuruma for useful advice and discussion  
469 and Ai Miyashita, Yuto Yashiro, Ken Aoi, Masayuki Ehara, Masataka Aoki and Yayoi  
470 Saito for assistance with the bioreactor operation. We also thank Juichiro Ashi and the  
471 R/V Yokosuka and “*Shinkai 6500*” operation team during cruise YK06-03 (JAMSTEC)  
472 and the shipboard scientists and crews of the *Chikyu* Shakedown Cruise CK06-06 for  
473 their assistance in collecting samples. This study was partially supported by grants from  
474 the Japan Society for the Promotion of Science (JSPS) (KAKENHI Grants 18687006,  
475 21687006, 24687011, 15H02419 and 19H01005 to H.I., 18H03367 to M.K.N., 26710012,  
476 18H02426, 18H05295 to H.T., and Grant-in-Aid for JSPS Fellow 16J10845 to N.N.).  
477 This work was also supported by JSPS KAKENHI Grant Number JP16H06280, Grant-  
478 in-Aid for Scientific Research on Innovative Areas – Platforms for Advanced  
479 Technologies and Research Resources “Advanced Bioimaging Support” and the  
480 Cooperative Study Program (19-504) of National Institute for Physiological Sciences.

481

482 **Author contributions** H.I. conceived the study and deep marine sediment sampling. H.I.,  
483 N.N., M.O., M.M. and S.S. conducted cultivation and culture-based experiments. M.K.N.  
484 and Y.Takaki performed genome analysis. H.I., N.N., Y.Morono, M.O., T.I., M.I, K.M.,  
485 C.S. and K.U. undertook the microscopy and NanoSIMS work. M.O., Y.S. and Y.Y.  
486 performed qPCR, SSU rRNA gene analysis and DNA/RNA sequencing. Y.Takano, Y.  
487 Matsui and E.T. performed chemical analysis. H.I., M.K.N., N.N., Y.Morono, Y. Takaki,  
488 Y.Takano, K.M., C.S., T.Y. Y.K. H.T. and K.T. conducted data interpretation. H.I.,  
489 M.K.N., Y.Takano, H.T., Y.K. and K.T. wrote the manuscript with input from all co-  
490 authors. All authors have read and approved the manuscript submission.

491

492 **Author Information** The authors declare no competing financial interests.  
493 Correspondence and requests for materials should be addressed to H.I  
494 ([imachi@jamstec.go.jp](mailto:imachi@jamstec.go.jp)) or M.K.N. ([m.nobu@aist.go.jp](mailto:m.nobu@aist.go.jp)).  
495

## 496 **Methods**

497 No statistical methods were used to predetermine sample size.

498 **Sampling site and sample description.** A 25-cm long sediment core (949C3) was  
499 collected from a methane-seep site at the Omine Ridge, Nankai Trough, off the Kumano  
500 area, Japan (33°7.2253'N, 136°28.6672'E), 2,533 m below the sea level, via the manned  
501 submersible “*Shinkai 6500*” (cruise YK06-03, dive no. 6K949, May 6th, 2006). The  
502 detailed sediment core sample and site information has been described previously<sup>15,42,43</sup>.  
503 Our previous geochemical and 16S rRNA gene analysis indicated that the occurrence of  
504 anaerobic oxidation of methane (AOM) reactions mediated by archaeal anaerobic  
505 methanotrophs (ANMEs) in the sediment<sup>15,42</sup>. The SSU rRNA gene analysis also showed  
506 that the sediment contained abundant and diverse microorganisms, most of which were  
507 affiliated with uncultured microbial groups, including Asgard archaea<sup>15,42</sup>.

508 **Culturing.** The deep-sea methane-seep sediment sample was first enriched using a  
509 continuous-flow bioreactor system supplemented with methane as the major energy  
510 source. The bioreactor, called a down-flow hanging sponge (DHS) bioreactor, has  
511 operated in our laboratory, JAMSTEC, Yokosuka Headquarters, since December 28,  
512 2006. The detailed operation conditions for the DHS bioreactor have been described  
513 previously<sup>15</sup>. To isolate anaerobic microorganisms, including Asgard archaea, from the  
514 DHS reactor, 2 ml samples of the bioreactor enrichment sediment slurry were inoculated  
515 in 15 ml glass tubes with a simple substrate and a basal medium. The composition of the  
516 basal medium was almost similar to that used for cultivation in the DHS bioreactor<sup>15</sup>, but  
517 it did not contain sulfate (i.e., Na<sub>2</sub>SO<sub>4</sub>). The basal medium composition was as follows  
518 (per liter): 9.47 g MgCl<sub>2</sub>·6H<sub>2</sub>O, 1.36 g CaCl<sub>2</sub>·2H<sub>2</sub>O, 20.7 g NaCl, 0.54 g NH<sub>4</sub>Cl, 0.14 g  
519 KH<sub>2</sub>PO<sub>4</sub>, 2.7 g NaHCO<sub>3</sub>, 0.3 g Na<sub>2</sub>S·9H<sub>2</sub>O, 0.3 g cysteine·HCl, 1 ml trace element  
520 solution<sup>15</sup>, 1 ml Se/W solution, 2 ml vitamin solution<sup>15</sup> and resazurin solution (1 mg/ml).  
521 The medium was purged with N<sub>2</sub>/CO<sub>2</sub> gas (80:20, v/v), and the pH was adjusted to 7.5 at  
522 25°C. The culture tubes were sealed with butyl rubber stoppers and screw caps.  
523 Autoclaved or filter-sterilized organic substances (such as protein-derived materials,  
524 sugars, and fatty acids) were added to the tubes with stock solutions prior to inoculation



525 with the bioreactor enriched community. After establishing a stable *Ca. P. syntrophicum*  
526 culture, cultivations were performed at 20°C in 50-ml serum vials containing 20 ml basal  
527 medium supplemented with CA (0.05%, w/v), 20 AAs (0.1 mM each), and PM (0.1%,  
528 w/v, Hohoemi, Meiji Co., Ltd.) under an atmosphere of N<sub>2</sub>/CO<sub>2</sub> (80:20, v/v) in the dark  
529 without shaking, unless mentioned otherwise. Information regarding the purity check of  
530 MK-D1 cultures, as well as additional information about cultivation, is described in the  
531 Supplementary Methods.

532 **SSU rRNA gene-based analysis.** DNA extraction and PCR mixture preparation were  
533 performed on a clean bench to reduce contamination. DNA extraction from culture  
534 samples was performed as described previously<sup>44</sup>. The concentration of extracted DNA  
535 was measured using a Quant-iT dsDNA High-Sensitivity Assay Kit (Life Technologies).  
536 PCR amplification was performed using the TaKaRa Ex *Taq* (for conventional clone  
537 analysis) or TaKaRa LA *Taq* (for Illumina-based amplicon sequencing [iTAG] for  
538 targeted sequencing for the SSU rRNA gene analysis) (TaKaRa Bio Inc.), and the reaction  
539 mixtures for PCR were prepared according to the manufacturer's instructions. For the  
540 conventional clone analysis, a universal primer pair 530F/907R<sup>42</sup> and an archaeal primer  
541 pair 340F/932R<sup>15,45</sup> were used for PCR amplification. For iTAG analysis, the universal  
542 primer pair 530F/907R, which contained overhang adapters at 5' ends, was used. The  
543 procedures used for library construction, sequencing, and data analysis were described  
544 previously<sup>19,46</sup>.

545 **Growth monitoring using qPCR.** For the quantitative analysis, a StepOnePlus Real-  
546 Time PCR System (Thermo Fisher Scientific) with a SYBR Premix Ex Taq II kit  
547 (TaKaRa Bio Inc.) was used. The candidate phylum Lokiarchaeota-specific primer pair  
548 MBGB525F/Ar912r was used for amplification of 16S rRNA genes. Primer MBGB525F  
549 is the complementary sequence of the MGBG525 probe<sup>17</sup>, while Ar912r is an archaeal  
550 universal primer that is a slightly modified version of the original designed primer<sup>47</sup>. The  
551 detailed procedure for qPCR is described in the Supplementary Methods. The doubling  
552 times of MK-D1 were calculated based on the semilogarithmic plot of the qPCR data.

553 **Growth test with multiple substrates.** To examine effect of the presence of other  
554 substances on growth of MK-D1, CA–20 AAs–PM medium supplemented with an  
555 individual substrate (Extended Data Table 3) was prepared, followed by qPCR and iTAG  
556 analyses. Each cultivation condition was set in duplicate; however, the H<sub>2</sub>-fed culture was  
557 prepared in triplicate because Sousa *et al.* (2016)<sup>7</sup> reported that a Lokiarchaeum has

558 potential to grow with hydrogen based on a comparative genome analysis. Detailed  
559 culture liquid sampling and the subsequent qPCR and iTAG analyses are described in the  
560 Supplementary Materials.

561 **Evaluation of growth temperature.** The test was performed using a basal medium  
562 containing CA and PM, with a pure co-culture of MK-D1 and *Methanogenium* as the  
563 inoculum (20%, v/v). The cultures were incubated at 4, 10, 15, 20, 25, 30, 37, and 40°C.  
564 All incubations for the test were performed in triplicate. After 100 days of incubation,  
565 16S rRNA gene copy numbers of MK-D1 were evaluated through qPCR technique.

566 **FISH.** Fixation of microbial cells, storage of the fixed cells, and standard FISH were  
567 performed in accordance with a previously described protocol<sup>19</sup>. The 16S rRNA-targeted  
568 oligonucleotide probes used in this study are listed in Supplementary Table S3. The  
569 designing of MK-D1-specific probes is described in the Supplementary Methods. As  
570 clear fluorescent signals were not obtained using the standard FISH technique, we  
571 employed an *in situ* DNA-hybridization chain reaction (HCR) technique<sup>48</sup>. The FISH  
572 samples were observed using epifluorescence microscopes (BX51 or BX53, Olympus)  
573 and a confocal laser scanning microscope (Nikon A1RMP, Nikon Instech).

574 **SEM.** Microbial cells were fixed overnight in 2.5% (w/v) glutaraldehyde in the CA–20  
575 AAs medium at 20°C. The sample preparation procedure has been described previously<sup>49</sup>.  
576 The cell samples were observed under a field emission (FE)-SEM (JSM-6700F, JEOL)  
577 or an extreme high-resolution FIB-SEM (Helios G4 UX, ThermoFisher Scientific).

578 **Ultrathin sectioning and TEM.** Cells were prefixed with 2.5% (w/v) glutaraldehyde for  
579 2 h. The specimens were frozen in a high-pressure freezing apparatus (EM-PACT2,  
580 Leica)<sup>50</sup>. The frozen samples were substituted with 2% OsO<sub>4</sub> in acetone for 3–4 days at -  
581 80°C, and the samples were warmed gradually to room temperature, rinsed with acetone  
582 embedded in epoxy resin (TAAB) Thin sections (70 nm) were cut with a ultramicrotome  
583 (EM-UC7, Leica). Ultra-thin sections of the cells were stained with 2% uranyl acetate  
584 and lead-stained solution (0.3% lead nitrate and 0.3% lead acetate, Sigma-Aldrich), and  
585 were observed by a transmission electron microscopy (Tecnai 20, FEI) at an acceleration  
586 voltage of 120 kV.

587 **Cryo-EM.** Due to the low cell yield-culture, 400 ml of the culture of MK-D1 was  
588 prepared and concentrated to about 5 ml using a 0.22 µm-pore-size polyethersulfone  
589 (PES) filter unit (Corning) in an anaerobic chamber (95:5 [v/v] N<sub>2</sub>:H<sub>2</sub> atmosphere; COY  
590 Laboratory Products). The concentrated culture liquid was placed in a glass vial in the

591 anaerobic chamber. After that, the head space of the glass vial was replaced by N<sub>2</sub>/CO<sub>2</sub>  
592 gas (80:20, v/v). Immediately before the electron microscopic observation, the glass vial  
593 was opened, and the liquid culture was concentrated to about 200 µl by centrifugation at  
594 20,400 g for 10 min at 20°C. Subsequently, 3 µl of the concentrated liquid culture was  
595 applied onto a Quantifoil Mo grid R1.2/1.3 (Quantifoil MicroTools) pretreated with glow-  
596 discharge, and was plunged-frozen in liquid ethane using a Vitrobot Mark IV (FEI  
597 Company) at 4°C and 95% humidity.

598 The frozen grid was mounted onto a 914 liquid-nitrogen cryo-specimen holder  
599 (Gatan Inc.) and loaded into a JEM2200FS electron microscope (JEOL) equipped with a  
600 field emission electron source operating at 200 kV and an omega-type in-column energy  
601 filter (slit width: 20 eV). The images were recorded on a DE-20 direct detector camera  
602 (Direct Electron LP.) at a nominal magnification of 15,000 x, which resulted in an  
603 imaging resolution of 3.66 Å per pixel, with the total dose under 20 electrons per Å<sup>2</sup> using  
604 a low dose system. For electron tomography, tilt series images were collected manually  
605 in a range of ~± 62° at 2° increments. The total electron dose on the specimen per tilt  
606 series was kept under 100 electrons per Å<sup>2</sup> to minimize radiation damage. The tilt series  
607 were aligned using gold fiducials, and tomograms were reconstructed using filtered back  
608 projection or SIRT in the IMOD software<sup>51</sup> with an image binning of 5.

609 **Lipid analysis.** About 120 ml of a highly purified culture sample were concentrated using  
610 the same method described above, except that the filtration concentration procedure was  
611 performed on a clean bench instead of the anaerobic chamber. Following cell collection,  
612 the cells were washed with the anaerobic basal medium to eliminate the interfering matrix.  
613 Subsequently, lipid analysis was conducted for the collected cells after the improved  
614 method<sup>52</sup>. For precise qualitative lipid analysis, gas chromatography (GC) combined  
615 with mass spectrometry (MS) on the 7890 system (Agilent Technologies Inc.) was  
616 conducted to compare the retention time and mass fragmentation signatures.

617 **Stable isotope probing and NanoSIMS analysis.** To confirm utilization of amino acids  
618 by MK-D1, a stable isotope probing experiment was performed using a <sup>13</sup>C- and <sup>15</sup>N-  
619 labeled amino acids mixture (Cambridge Isotope Laboratories). Briefly, 120 ml serum  
620 vials containing 40 ml basal medium were prepared and supplemented with the stable  
621 isotope labeled 20 AAs (roughly 0.1 mM of each), CA (0.05%, w/v) and non-labeled 20  
622 AAs mixture (0.1 mM of each). Two types of highly purified cultures of MK-D1 were  
623 used as inocula: a co-culture with *Methanobacterium* sp. strain MO-MB1 and a tri-culture

624 with *Halodesulfovibrio* and *Methanogenium*. The vials were incubated at 20°C in the dark  
625 without shaking for 120 days. A reference cultivation was also performed under the same  
626 cultivation condition without the addition of the stable isotope labeled 20 AAs mixture  
627 (Extended Data Table 2). The detailed sample preparation and analysis method using  
628 NanoSIMS is described in the Supplementary Methods.

629 **Chemical analysis.** The stable carbon isotope compositions of methane and carbon  
630 dioxide in the sampled gas phase were analyzed as described previously (Okumura et al.  
631 2016). Methane concentrations were measured by gas chromatography (GC-4000, GL  
632 Science Inc., Tokyo, Japan) using a Shincarbon ST 50/80 column (1.0 m x 3.0 mm ID,  
633 Shinwa Chem. Ind.) and a flame ionization detector with nitrogen as a carrier gas.

634 Amino acid concentrations in pure co-cultures of MK-D1 and *Methanogenium* were  
635 quantified through a previously described method<sup>53,54</sup>. In brief, we processed the acid  
636 hydrolysis with 6 M HCl (110°C, 12 h) for the culture liquid samples after filtration using  
637 a 0.2 µm pore-size polytetrafluoroethylene filter unit (Millipore). The amino acid fraction  
638 was derivatized to N-pivaloyl iso-propyl esters prior to GC using a 6890N GC instrument  
639 connected to the nitrogen phosphorus and flame ionization detectors (Agilent  
640 Technologies Inc.). For cross-validation of qualitative identification of amino acids, GC-  
641 MS on the 7890 system (Agilent Technologies Inc.) was used<sup>52</sup>.

642 **Genome sequencing and assembly.** DNA extraction was performed as described  
643 previously<sup>44</sup>. Mate-paired library with an average insert size of 3000 bp was constructed  
644 according to the manufacturer's instructions with Nextera Mate Pair Library Preparation  
645 kit (Illumina). Library sequencing was performed using Illumina MiSeq platform (2 x  
646 300 bp), which resulted in 3,822,290 paired reads. The mate pair reads were processed as  
647 follows: adapters and low-quality sequences were removed using Trimmomatic ver.  
648 0.33<sup>55</sup>, and the linker sequences were removed using NextClip ver. 1.3.1<sup>56</sup>. *De novo*  
649 assembly was performed using SPAdes ver 3.1.1<sup>57</sup> with multiple k-mer sizes (21, 33, 55,  
650 77, and 99), which resulted in 3,487 contigs with lengths >500 bp, totaling upto 14.68  
651 Mbp. The software MyCC<sup>58</sup> was used with default parameters for binning based on  
652 genomic signatures, marker genes, and contig coverages. As heterogeneity in the  
653 sequence can cause highly fragmented or redundant contigs, the ambiguous contigs  
654 (sequence coverage < 5 or a length < 1kb) and redundant contigs were discarded from  
655 binning. This resulted in the recovery of genomes related to Lokiarchaeum (i.e., *Ca. P.*  
656 *syntrophicum* MK-D1, 4.46 Mbp), *Halodesulfovibrio* (4.13 Mbp) and *Methanogenium*

657 (2.33 Mbp). Scaffold for each bin were constructed using SSPACE ver. 3.0<sup>59</sup> with mate-  
658 paired information of Illumina reads. To obtain the complete genome sequence of *Ca. P.*  
659 *syntrophicum*, the gaps were filled using Sanger sequencing method. Genomes were  
660 annotated using Prokka v1.12<sup>60</sup> and manually curated. The curation involved functional  
661 domain analysis through CD-Search with its corresponding conserved domain  
662 database<sup>61,62</sup>; signal peptide and transmembrane domain prediction through SignalP  
663 v4.1<sup>63</sup>; carbohydrate-active enzyme, peptidase, and lipase prediction through dbCAN  
664 5.0<sup>64</sup>, MEROPS<sup>65</sup>, and lipase engineering database<sup>66</sup>; and hydrogenase annotation with  
665 assistance from HydDB<sup>67</sup>. In addition, to further verify the function, we compared the  
666 sequence similarity of each gene to UNIPROT/KB/SWISSPROT containing enzymes  
667 with experimentally verified catalytic activity and genes with extensive genetic,  
668 phylogenetic, and/or genomic characterizations<sup>68,69</sup> with a 40% amino acid similarity  
669 cutoff. For enzymes that have divergent functions even with a 40% similarity cutoff (e.g.,  
670 [FeFe] and [NiFe] hydrogenases, 3-oxoacid oxidoreductases, glutamate dehydrogenases,  
671 and sugar kinases), phylogenetic trees were constructed with reference sequences to  
672 identify association of the query sequences to phylogenetic clusters containing enzymes  
673 with characterized catalytic activity.

674 **Phylogenetic analysis.** Phylogenomic tree of MK-D1 and select cultured archaea,  
675 eukaryotes, and bacteria. 31 ribosomal proteins conserved across the three domains  
676 (Supplementary Table S4) were collected from MK-D1, the organisms shown in the tree,  
677 and metagenome-assembled genomes (MAGs) of uncultured archaeal lineages  
678 (Supplementary Table S5). Two alignments were performed in parallel: (i) only including  
679 sequences from cultured organisms and (ii) also including MAG-derived sequences.  
680 MAFFT v7 (--linsi) was used for alignment in both cases<sup>70</sup>. For the latter, MAG-derived  
681 sequences were included to generate an alignment that maximizes the archaeal diversity  
682 taken into account, but removed for subsequent tree construction to avoid any influence  
683 of contamination (*i.e.*, concatenation of sequences that do not belong to the same  
684 organism). *Ca. Korarchaeum* sequences were kept in the tree based on the  
685 cultured+uncultured alignment due to its critical phylogenetic position in TACK  
686 phylogeny. After removing all-gap positions and concatenation, the maximum likelihood  
687 trees were constructed using RAXML-NG (fixed empirical substitution matrix [LG], 4  
688 discrete GAMMA categories, empirical AA frequencies, and 100 bootstrap replicates)<sup>71</sup>.  
689 Bootstrap values around critical branching points are also shown. For 16S ribosomal

690 RNA phylogeny, sequences were aligned using SINA<sup>72</sup> against the Silva v132  
691 alignment<sup>73</sup>. The maximum likelihood tree was calculated using RAxML<sup>74</sup> using fixed  
692 empirical substitution matrix (LG), 4 discrete GAMMA categories, empirical amino acid  
693 frequencies from the alignment, and 100 bootstrap replicates. For analysis of urocanate  
694 hydratase, serine/threonine dehydratase, succinate dehydrogenase flavoprotein, fatty-  
695 acid--CoA ligase, and 3-ketoacyl-CoA thiolase homologs were collected through  
696 BLASTp analysis of the Asgard archaea sequences against the UniProt database (release  
697 2019\_06). Of homologs with sequence similarity  $\geq 40\%$  and overlap  $\geq 70\%$ , representative  
698 sequences were selected using CD-HIT with a clustering cutoff of 70% similarity (default  
699 settings otherwise). Additional homologs with verified biochemical activity, sequence  
700 similarity  $\geq 30\%$ , and overlap  $\geq 70\%$  were collected through BLASTp analysis of the  
701 Asgard archaea sequences against the UniProt/SwissProt database. Sequences were  
702 aligned using MAFFT v7<sup>70</sup> with default settings and trimmed using trimAl<sup>75</sup> with default  
703 settings. The phylogenetic tree was constructed using RAxML-NG<sup>71</sup> using fixed  
704 empirical substitution matrix (LG), 4 discrete GAMMA categories, empirical amino acid  
705 frequencies from the alignment, and 100 bootstrap replicates.

706 For analysis of biotin ligase and biotin carboxyl carrier protein, homologs were  
707 collected through BLASTp analysis of the Asgard archaea sequences against the UniProt  
708 database (release 2019\_06). Of homologs with sequence similarity  $\geq 40\%$  and overlap  
709  $\geq 70\%$ , representative sequences were selected using CD-HIT with a clustering cutoff of  
710 70% similarity (default settings otherwise). Additional homologs with verified  
711 biochemical activity, sequence similarity  $\geq 30\%$ , and overlap  $\geq 70\%$  were collected  
712 through BLASTp analysis of the Asgard archaea sequences against the  
713 UniProt/SwissProt database. Sequences were aligned using MAFFT v7<sup>70</sup> with default  
714 settings and trimmed using trimAl<sup>75</sup> with default settings. The phylogenetic tree was  
715 constructed using FastTree<sup>76</sup> using fixed empirical substitution matrix (LG) and 1000  
716 bootstrap replicates.

717 **RNA based sequencing analysis.** To perform RNA based sequencing analysis, 100 ml  
718 of culture liquid were prepared from five highly purified cultures that were incubated  
719 with CA, 20 AAs, and PM for about 100 days at 20°C. Before RNA extraction, the growth  
720 of MK-D1 was confirmed using the qPCR technique, and the cells density levels were  
721  $\sim 10^5$  copies/ml in each culture.

722 To harvest microbial cells, the culture liquid was filtered through a 0.22- $\mu$ m pore-  
723 size mixed cellulose ester membrane filter (GSWP01300, Merck MilliPore) on a clean  
724 bench. After filtration, the membrane was cut in half with a sterilized scissors and then  
725 directly inserted into the PowerBiofilm bead tubes of a PowerBiofilm RNA Isolation kit  
726 (MO BIO Laboratories). The following RNA extraction procedures were performed  
727 according to the manufacturer's instructions. The extracted RNA was applied to an RNA  
728 clean & concentrator kit-5 (Zymo Research) for concentration. The obtained RNA was  
729 quantified using an Agilent 2100 Bioanalyzer system with an RNA Pico kit (Agilent  
730 Technologies) and then applied to an Ovation Universal RNA-Seq System (NuGEN  
731 Technologies) for the construction of an RNA sequence library. At the step for Insert  
732 Dependent Adaptor Cleavage technology mediated adaptor cleavage during the library  
733 construction, specific primers for 16S rRNA and 23S rRNA genes of MK-D1 were used  
734 to reduce rRNA gene sequences from the cDNA pool. The constructed cDNA library was  
735 sequenced using the MiSeq platform (Illumina).

736 The raw RNA sequencing data were trimmed by removal of the adapters and low-  
737 quality sequences using Trimmomatic ver. 0.33<sup>55</sup>. The expression abundance of all coding  
738 transcripts was estimated in RPKM values using EDGE-pro ver. 1.3.1<sup>77</sup>.

739 **Data availability.** Genomes for *Ca. Prometheoarchaeum syntrophicum* MK-D1,  
740 *Halodesulfovibrio* sp. MK-HDV, and *Methanogenium* sp. MK-MG are available under  
741 Genbank BioProjects PRJNA557562, PRJNA557563, and PRJNA557565 respectively.  
742 The iTAG sequence data was deposited in Bioproject PRJDB8518 with the accession  
743 numbers DRR184081–DRR184101. The 16S rRNA gene sequences of MK-D1,  
744 *Halodesulfovibrio* sp. MK-HDV, *Methanogenium* sp. MK-MG and clones obtained from  
745 primary enrichment culture were deposited in the DDBJ/EMBL/GenBank database under  
746 accession numbers LC490619–LC490624.

747

- 748 42. Nunoura, T. *et al.* Microbial diversity in deep-sea methane seep sediments  
749 presented by SSU rRNA gene tag sequencing. *Microbes Environ.* **27**, 382–  
750 390 (2012).
- 751 43. Toki, T., Higa, R., Ijiri, A., Tsunogai, U. & Ashi, J. Origin and transport of  
752 pore fluids in the Nankai accretionary prism inferred from chemical and  
753 isotopic compositions of pore water at cold seep sites off Kumano. *Earth  
754 Planet Space* **66**, 137 (2014).

- 755 44. Nakahara, N. *et al.* *Aggregatilinea lenta* gen. nov., sp. nov., a slow-growing,  
756 facultatively anaerobic bacterium isolated from subseafloor sediment, and  
757 proposal of the new order *Aggregatilineales* ord. nov. within the class  
758 *Anaerolineae* of the phylum *Chloroflexi*. *Int. J. Syst. Evol. Microbiol.* **69**,  
759 1185–1194 (2019).
- 760 45. Murakami, S., Fujishima, K., Tomita, M. & Kanai, A. Metatranscriptomic  
761 analysis of microbes in an oceanfront deep-subsurface hot spring reveals  
762 novel small RNAs and type-specific tRNA degradation. *Appl. Environ.*  
763 *Microbiol.* **78**, 1015–1022 (2012).
- 764 46. Imachi, H. *et al.* Cultivable microbial community in 2-km-deep, 20-million-  
765 year-old subseafloor coalbeds through ~1000 days anaerobic bioreactor  
766 cultivation. *Sci. Rep.* **9**, 2305 (2019).
- 767 47. Miyashita, A. *et al.* Development of 16S rRNA gene-targeted primers for  
768 detection of archaeal anaerobic methanotrophs (ANMEs). *FEMS Microbiol.*  
769 *Lett.* **297**, 31–37 (2009).
- 770 48. Yamaguchi, T. *et al.* In situ DNA-hybridization chain reaction (HCR): a  
771 facilitated in situ HCR system for the detection of environmental  
772 microorganisms. *Environ. Microbiol.* **17**, 2532–2541 (2015).
- 773 49. Miyazaki, M. *et al.* *Sphaerochaeta multiformis* sp. nov., an anaerobic,  
774 psychrophilic bacterium isolated from subseafloor sediment, and emended  
775 description of the genus *Sphaerochaeta*. *Int. J. Syst. Evol. Microbiol.* **64**,  
776 4147–4154 (2014).
- 777 50. Toyooka, K. *et al.* Wide-range high-resolution transmission electron  
778 microscopy reveals morphological and distributional changes of  
779 endomembrane compartments during log to stationary transition of growth  
780 phase in tobacco BY-2 cells. *Plant Cell Physiol.* **55**, 1544–1555 (2014).
- 781 51. Kremer, J. R., Mastrorarde, D. N. & McIntosh, J. R. Computer visualization  
782 of three-dimensional image data using IMOD. *J. Struct. Biol.* **116**, 71–76  
783 (1996).
- 784 52. Takano, Y. *et al.* Insight into anaerobic methanotrophy from  $^{13}\text{C}/^{12}\text{C}$ -amino  
785 acids and  $^{14}\text{C}/^{12}\text{C}$ -ANME cells in seafloor microbial ecology. *Sci. Rep.* **8**,  
786 14070 (2018).
- 787 53. Takano, Y., Kashiyama, Y., Ogawa, N. O., Chikaraishi, Y. & Ohkouchi, N.



- 788 Isolation and desalting with cation-exchange chromatography for  
789 compound-specific nitrogen isotope analysis of amino acids: application to  
790 biogeochemical samples. *Rapid Commun. Mass Spectrom.* **24**, 2317–2323  
791 (2010).
- 792 54. Chikaraishi, Y. *et al.* *Instrumental Optimization for Compound-specific*  
793 *Nitrogen Isotope Analysis of Amino Acids by Gas Chromatography/*  
794 *Combustion/Isotope Ratio Mass Spectrometry in Earth, Life and Isotopes*  
795 (eds. Ohkouchi, N. *et al.*) 367–386 (Kyoto University Press, 2010).
- 796 55. Bolger, A. M., Lohse, M. & Usadel, B. Trimmomatic: a flexible trimmer for  
797 Illumina sequence data. *Bioinformatics* **30**, 2114–2120 (2014).
- 798 56. Leggett, R. M., Clavijo, B. J., Clissold, L., Clark, M. D. & Caccamo, M.  
799 NextClip: an analysis and read preparation tool for Nextera Long Mate Pair  
800 libraries. *Bioinformatics* **30**, 566–568 (2014).
- 801 57. Bankevich, A. *et al.* SPAdes: A new genome assembly algorithm and its  
802 applications to single-cell sequencing. *J. Comput. Biol.* **19**, 455–477 (2012).
- 803 58. Lin, H.-H. & Liao, Y.-C. Accurate binning of metagenomic contigs via  
804 automated clustering sequences using information of genomic signatures and  
805 marker genes. *Sci. Rep.* **6**, 24175 (2016)
- 806 59. Boetzer, M., Henkel, C. V., Jansen, H. J., Butler, D. & Pirovano, W.  
807 Scaffolding pre-assembled contigs using SSPACE. *Bioinformatics* **27**, 578–  
808 579 (2011).
- 809 60. Seemann, T. Prokka: rapid prokaryotic genome annotation. *Bioinformatics*  
810 **30**, 2068–2069 (2014).
- 811 61. Marchler-Bauer, A. & Bryant, S. H. CD-Search: protein domain annotations  
812 on the fly. *Nucleic Acids Res.* **32**, W327–W331 (2004).
- 813 62. Marchler-Bauer, A. *et al.* CDD: NCBI's conserved domain database. *Nucleic*  
814 *Acids Res.* **43**, D222–226 (2015).
- 815 63. Petersen, T. N., Brunak, S., Heijne, von, G. & Nielsen, H. SignalP 4.0:  
816 discriminating signal peptides from transmembrane regions. *Nat. Meth.* **8**,  
817 785–786 (2011).
- 818 64. Yin, Y. *et al.* dbCAN: a web resource for automated carbohydrate-active  
819 enzyme annotation. *Nucleic Acids Res.* **40**, W445–W451 (2012).
- 820 65. Rawlings, N. D., Barrett, A. J. & Finn, R. Twenty years of the MEROPS

- 821 database of proteolytic enzymes, their substrates and inhibitors. *Nucleic*  
822 *Acids Res.* **44**, D343–D350 (2016).
- 823 66. Fischer, M. & Pleiss, J. The lipase engineering database: a navigation and  
824 analysis tool for protein families. *Nucleic Acids Res.* **31**, 319–321 (2003).
- 825 67. Søndergaard, D., Pedersen, C. N. S. & Greening, C. HydDB: A web tool for  
826 hydrogenase classification and analysis. *Sci. Rep.* **6**, 34212 (2016).
- 827 68. Boutet, E., Lieberherr, D., Tognolli, M., Schneider, M. & Bairoch, A.  
828 UniProtKB/Swiss-Prot. *Methods Mol. Biol.* **406**, 89–112 (2007).
- 829 69. Lima, T. *et al.* HAMAP: a database of completely sequenced microbial  
830 proteome sets and manually curated microbial protein families in  
831 UniProtKB/Swiss-Prot. *Nucleic Acids Res.* **37**, D471–D478 (2009).
- 832 70. Katoh, K. & Standley, D. M. MAFFT multiple sequence alignment software  
833 version 7: improvements in performance and usability. *Mol. Biol. Evol.* **30**,  
834 772–780 (2013).
- 835 71. Kozlov, A. M., Darriba, D., Flouri, T., Morel, B. & Stamatakis, A. RAxML-  
836 NG: A fast, scalable, and user-friendly tool for maximum likelihood  
837 phylogenetic inference. *Bioinformatics* (2019). in press.
- 838 72. Pruesse, E., Peplies, J. & Glöckner, F. O. SINA: Accurate high-throughput  
839 multiple sequence alignment of ribosomal RNA genes. *Bioinformatics* **28**,  
840 1823–1829 (2012).
- 841 73. Quast, C. *et al.* The SILVA ribosomal RNA gene database project: improved  
842 data processing and web-based tools. *Nucleic Acids Res.* **41**, D590–D596  
843 (2013).
- 844 74. Stamatakis, A. RAxML version 8: a tool for phylogenetic analysis and post-  
845 analysis of large phylogenies. *Bioinformatics* **30**, 1312–1313 (2014).
- 846 75. Capella-Gutiérrez, S., Silla-Martínez, J. M. & Gabaldón, T. trimAl: a tool for  
847 automated alignment trimming in large-scale phylogenetic analyses.  
848 *Bioinformatics* **25**, 1972–1973 (2009).
- 849 76. Price, M. N., Dehal, P. S. & Arkin, A. P. FastTree 2—approximately  
850 maximum-likelihood trees for large alignments. *PLoS ONE* **5**, e9490 (2010).
- 851 77. Magoc, T., Wood, D. & Salzberg, S. L. EDGE-pro: estimated degree of gene  
852 expression in prokaryotic genomes. *Evol. Bioinform. Online* **9**, 127–136  
853 (2013).

- 854 78. Axley, M. J. & Grahame, D. A. Kinetics for formate dehydrogenase of  
855 *Escherichia coli* formate-hydrogenlyase. *J. Biol. Chem.* **266**, 13731–13736  
856 (1991).
- 857 79. Itoh, T., Suzuki, K.-I. & Nakase, T. *Thermocladium modestius* gen. nov., sp.  
858 nov., a new genus of rod-shaped, extremely thermophilic crenarchaeote. *Int.*  
859 *J. Syst. Bacteriol.* **48**, 879–887 (1998).
- 860 80. Zillig, W. *et al.* The archaebacterium *Thermofilum pendens* represents, a  
861 novel genus of the thermophilic, anaerobic sulfur respiring *Thermoproteales*.  
862 *Syst. Appl. Microbiol.* **4**, 79–87 (1983).

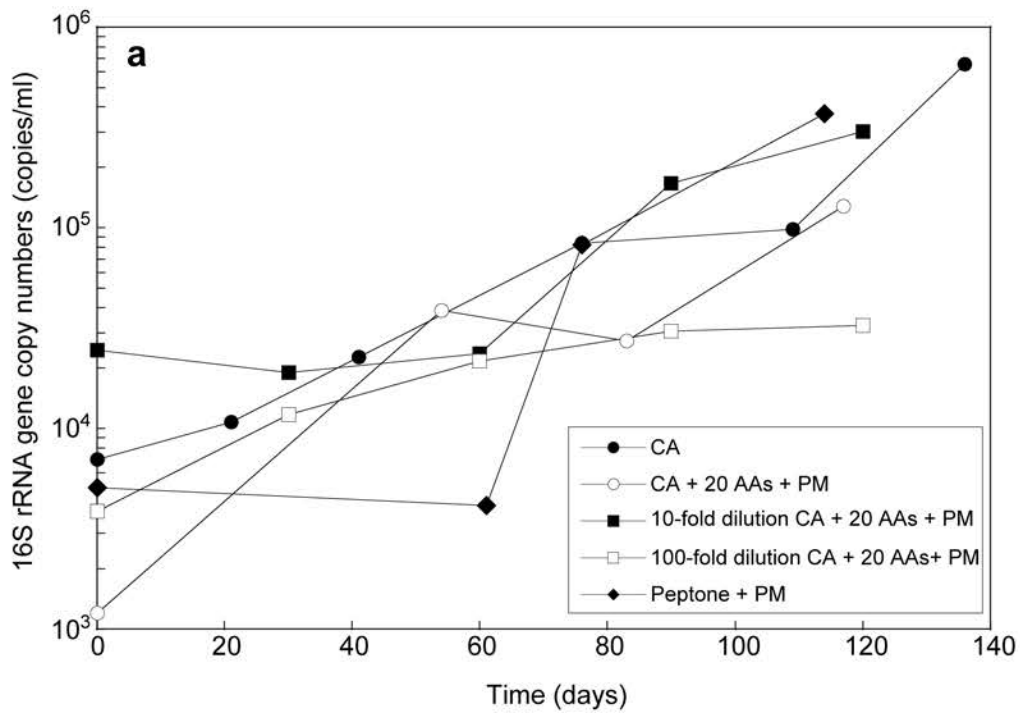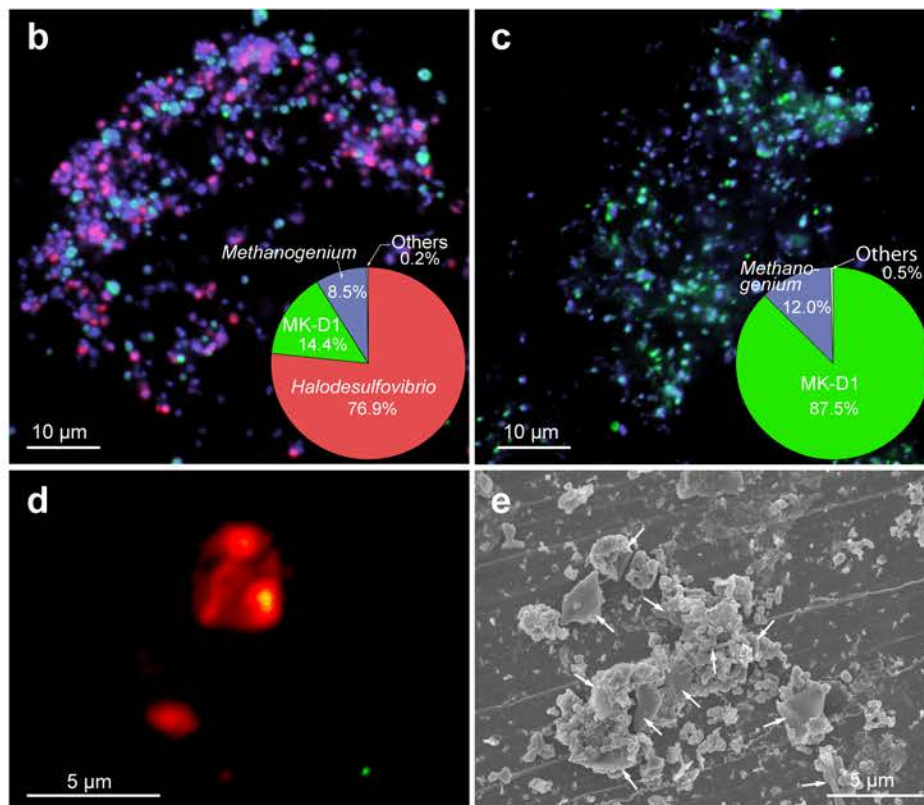

**Fig. 1 | Growth curves and photomicrographs of the cultured Lokiarchaeota strain MK-D1.** **a**, Growth curves of MK-D1 in anaerobic media supplemented with Casamino acids (CA; 0.05%, w/v) alone; CA with 20 amino acids (20 AAs; 0.1 mM of each) and powdered milk (PM; 0.1%, w/v) or peptone (0.1%, w/v) with PM. Results are also shown for cultures fed with 10- and 100-fold dilution of CA, 20 AAs, and PM. **b**, **c**, Fluorescence images of cells from enrichment cultures after eight (**b**) and eleven (**c**) transfers stained with DAPI (violet) and hybridized with nucleotide probes targeting MK-D1 (green) and *Bacteria* (red). Pie charts show relative abundance of microbial populations based on SSU rRNA gene tag-sequencing (iTAG) analysis. **d**, A fluorescence image of cells from enrichment cultures after eleven transfers hybridized with nucleotide probes targeting MK-D1 (green) and *Methanogenium* (red). **e**, SEM image of a highly purified co-culture of MK-D1 and *Methanogenium*. White arrows indicate *Methanogenium* cells. The detailed iTAG-based community compositions of cultures corresponding to each of the images are shown in Supplementary Table S2.

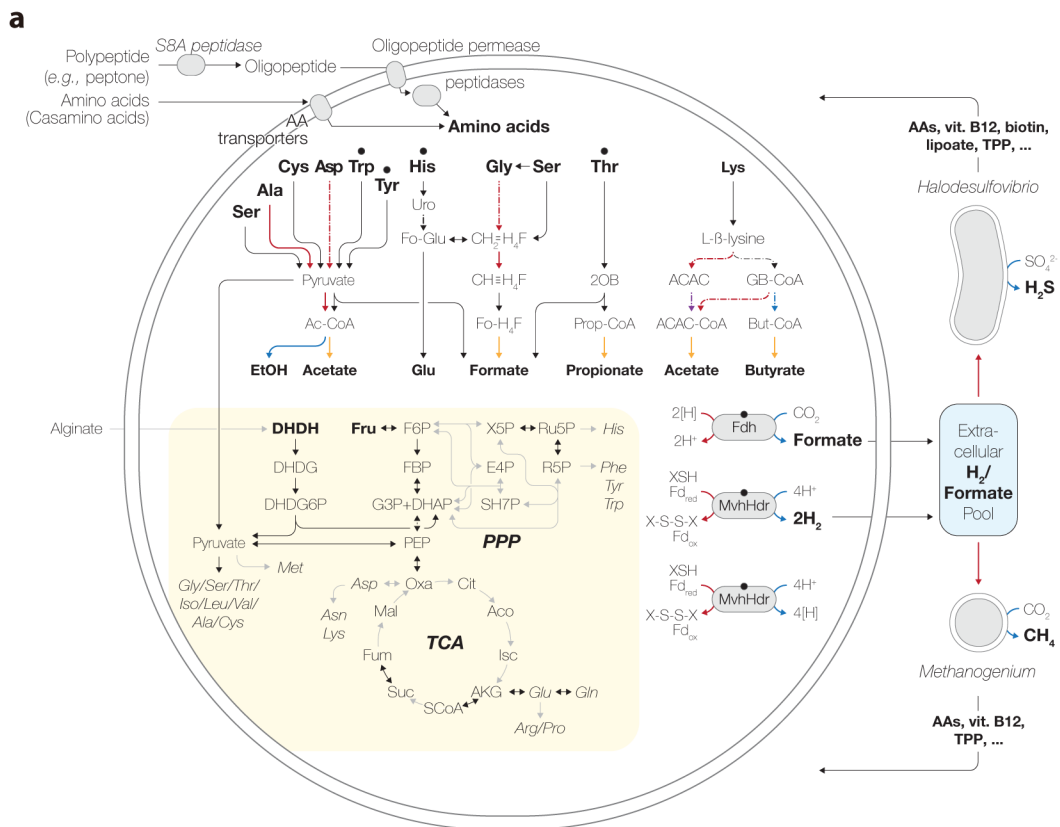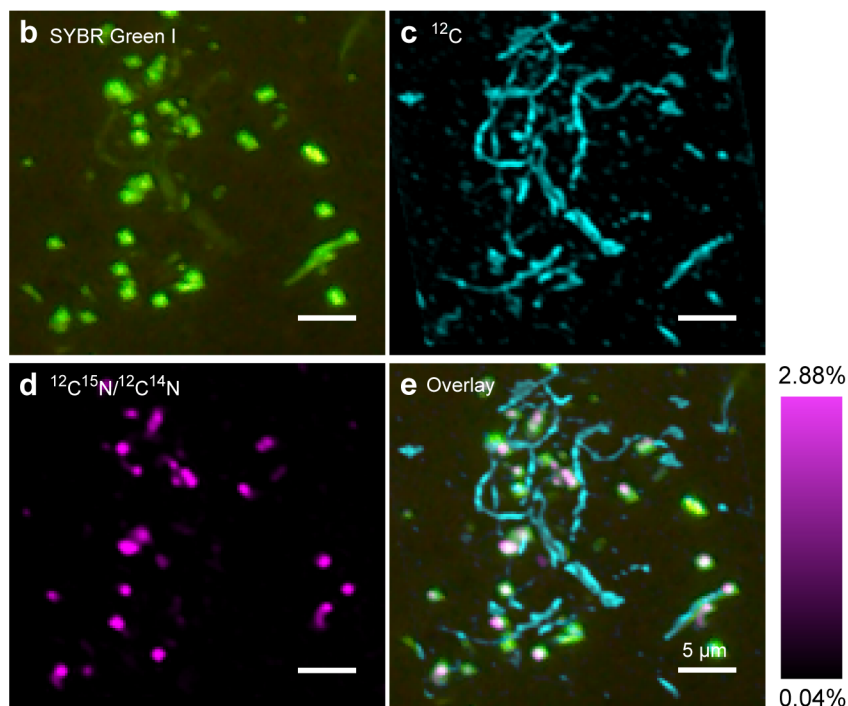

**Fig. 2 | Syntrophic amino acid utilization of MK-D1. a**, Genome-based metabolic reconstruction of MK-D1. Metabolic pathways identified (colored or black) and not identified (gray) are shown. For identified pathways, each step (solid line) or process (dotted) is marked by whether it is oxidative (red), reductive (blue), ATP-yielding (orange), or ATP-consuming (purple). Wavy arrows indicate exchange of compounds: formate, H<sub>2</sub>, AAs, vitamin B<sub>12</sub>, biotin, lipolate, and thiamine pyrophosphate (tpp) which are predicted to be metabolized or synthesized by the partnering *Halodesulfovibrio* and/or *Methanogenium*. Biosynthetic pathways are indicated with a yellow background. Metatranscriptomics-detected AA-catabolizing pathways are indicated (black dots above AAs). Abbreviations: 4,5-dihydroxy-2,6-dioxohexanoate (DHDH), 2-dehydro-3-deoxy-D-gluconate (DHDG), 3-dehydro-3-deoxy-D-gluconate 6-phosphate (DHDG6P), acetyl-CoA (Ac-CoA), urocanate (uro), formyl glutamate (Fo-Glu), methylene-tetrahydrofolate (CH<sub>3</sub>=H<sub>4</sub>F), methenyl-tetrahydrofolate (CH=H<sub>4</sub>F), formyl-tetrahydrofolate (Fo-H<sub>4</sub>F), 2-oxobutyrate (2OB), propionyl-CoA (Prop-CoA), acetoacetate (ACAC), gamma-amino-butyryl-CoA (GB-CoA), butyryl-CoA (But-CoA), ferredoxin (Fd), thiol/disulfide pair (XSH/X-S-S-X), tricarboxylic acid (TCA) cycle, and pentose-phosphate pathway (PPP). **b-e**, NanoSIMS analysis of a highly purified MK-D1 culture incubated with <sup>13</sup>C- and <sup>15</sup>N-labeled AA mixture. **b**, Green fluorescent micrograph of SYBR Green I-stained cells. Aggregates are MK-D1, and filamentous cells are *Methanobacterium* sp. strain MO-MB1 (fluorescence can be weak due to high rigidity and low permeability of cell membrane [Supplementary Fig. S1]). **c**, NanoSIMS ion image of <sup>12</sup>C (cyan). **d**, NanoSIMS ion image of <sup>12</sup>C<sup>15</sup>N/<sup>12</sup>C<sup>14</sup>N (magenta). **e**, Overlay image of **b-d**. The right-hand scale bar indicates the relative abundance of <sup>15</sup>N expressed as <sup>15</sup>N/<sup>14</sup>N. The iTAG analysis of the imaged culture is shown in Supplementary Table S2.

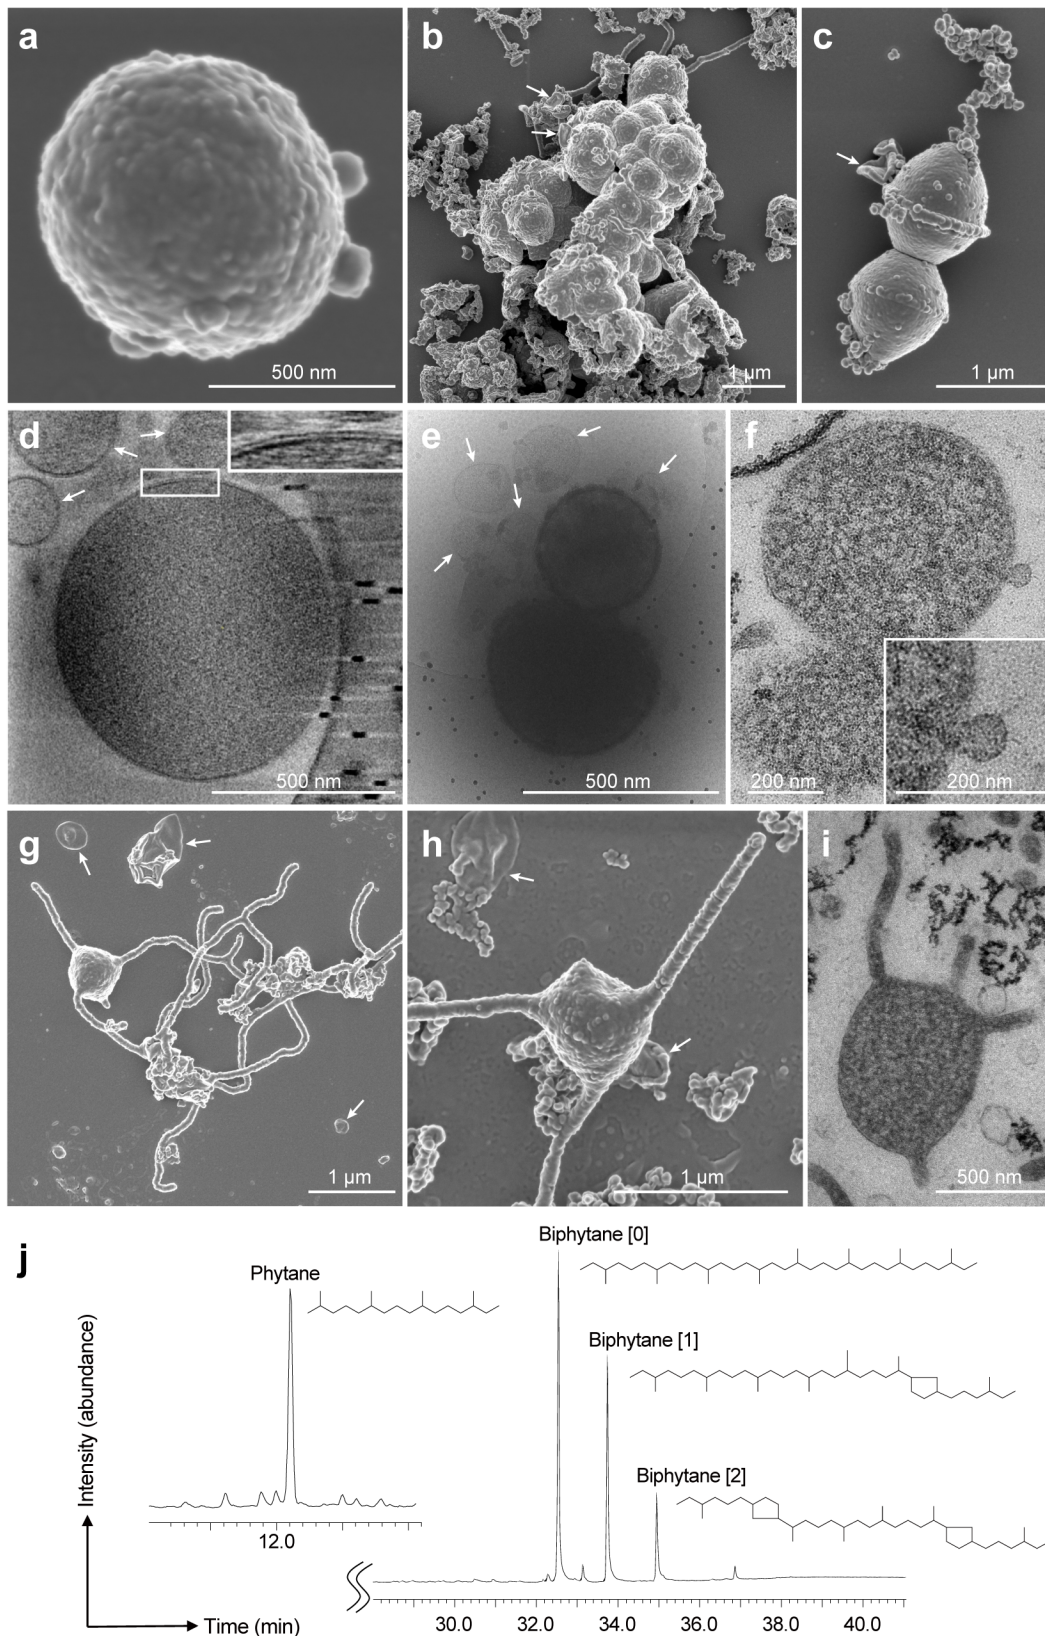

**Fig. 3 | Microscopic characterization and lipid composition of MK-D1.** **a–c**, SEM images of MK-D1. Single cell (**a**), aggregated cells covered with EPS-like materials (**b**), and a dividing cell with polar chains of blebs (**c**). **d**, Cryo-electron tomography image of MK-D1. The upper-right inset image shows a close-up of the boxed area for showing cell envelope structure. **e**, Cryo-electron microscopy (EM) image of large MVs attached and surrounding MK-D1 cells. **f**, Ultrathin section of an MK-D1 cell and an MV. The lower-right inset image shows a magnified view of the MV. **g**, **h**, SEM images of MK-D1 cells producing long branching (**g**) and straight (**h**) membrane protrusions. **i**, Ultrathin section of a MK-D1 cell with protrusions. **j**, A total ion chromatogram of mass spectrometry for lipids extracted from a highly purified MK-D1 culture. The chemical structures of isoprenoid lipids are also shown (see also Supplementary Fig. S2). The experiment were repeated twice and gave similar results. White arrows in the images indicate large MVs. Detailed iTAG-based community compositions of the cultures are shown in Supplementary Table S2.

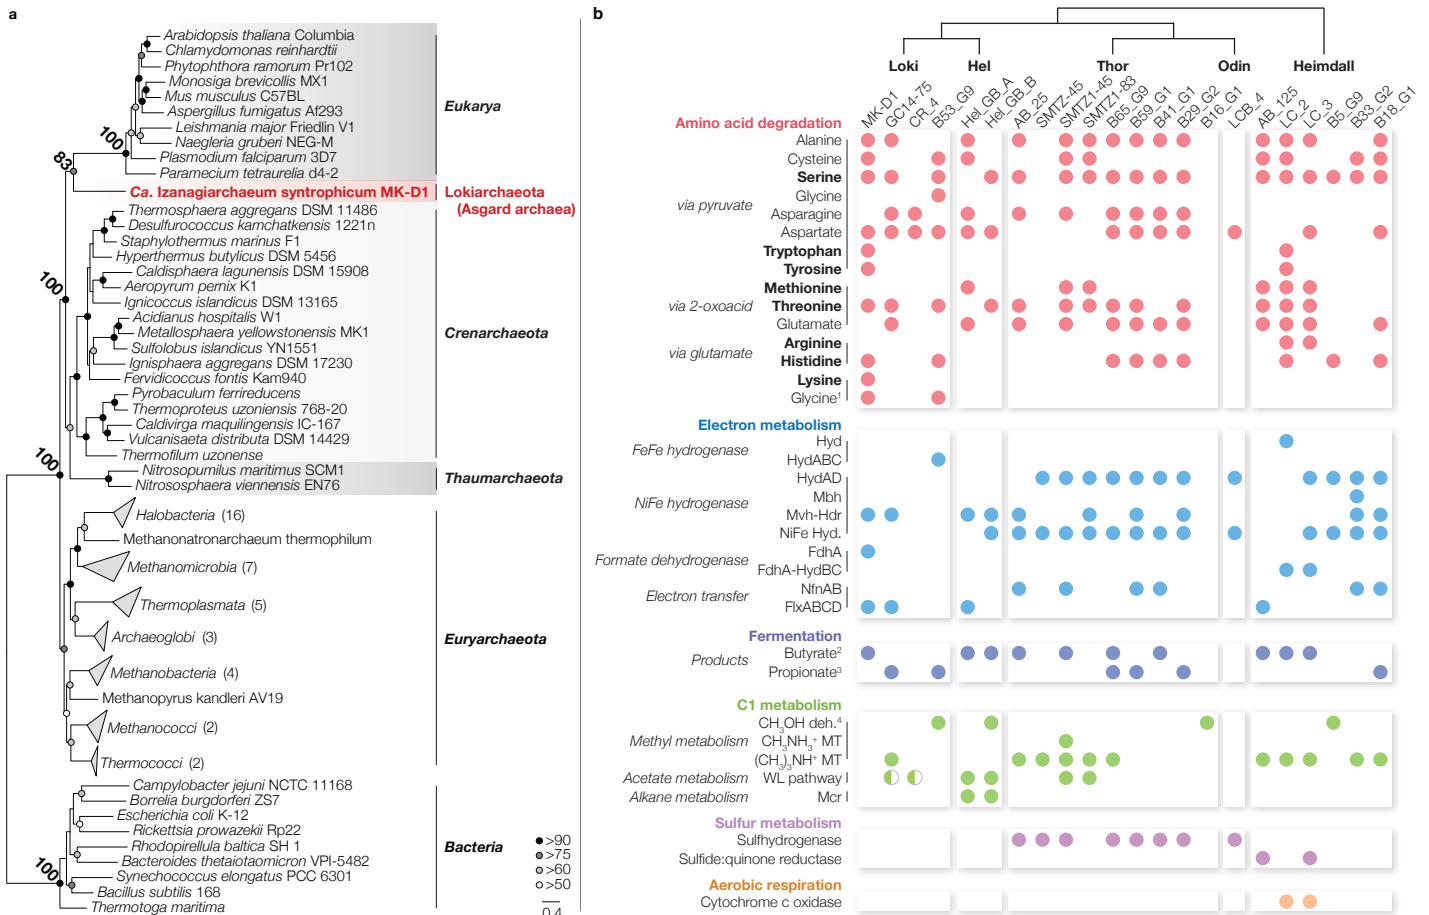

**Fig. 4 | Phylogeny of MK-D1 and catabolic features of Asgard archaea. a**, Phylogenomic tree of MK-D1 and select cultured archaea, eukaryotes, and bacteria based on 31 ribosomal proteins conserved across the three domains (Supplementary Table S4). Ribosomal protein sequences were collected from MK-D1 and other representative cultured organisms (Supplementary Table S5) and aligned individually using MAFFT (--linsi). After removing all-gap positions and concatenation, the maximum likelihood tree was constructed using RAxML-ng (fixed empirical substitution matrix [LG], 4 discrete GAMMA categories, empirical AA frequencies, and 100 bootstrap replicates). Bootstrap values around critical branching points are also shown. **b**, The presence/absence of AA degradation, electron metabolism, fermentation, C1 metabolism, sulfur metabolism, and aerobic respiration in individual genomes are shown (complete pathway – full circle; mostly complete pathway – half circle). For AA metabolism, pathways that are exclusively used for catabolism/degradation are bolded. <sup>1</sup> Glycine metabolism through pyruvate (above) or formate (below). <sup>2</sup> Butyrate metabolism is reversible (fermentation or beta oxidation), but the butyryl-CoA dehydrogenases tend to be associated with EtfAB in the genomes, suggesting formation of an electron-confurcating complex for butyrate fermentation. <sup>3</sup> Determined by presence of methylmalonyl-CoA decarboxylase, biotin carboxyl carrier protein, and pyruvate carboxylase. Propionate metabolism is also reversible, but no Asgard archaea member encodes the full set of genes necessary for syntrophic propionate degradation. <sup>4</sup> Alcohol dehydrogenases can have diverse substrate specificities. Abbreviations: monomeric FeFe hydrogenase (Hyd), trimeric electron-confurcating FeFe hydrogenase (HydABC), reversible NADPH-dependent NiFe hydrogenase (HydAD), reversible heterodisulfide-dependent electron-confurcating hydrogenase (Mvh-Hdr), other NiFe hydrogenases (NiFe Hyd.), formate dehydrogenase (FdhA), putative electron-confurcating formate dehydrogenase (FdhA-HydBC), NADH-dependent NADPH:ferredoxin oxidoreductase (NfnAB), heterodisulfide- and flavin-dependent oxidoreductase of unknown function (FlxABCD), tetrahydromethanopterin methyltransferase (MT), Wood-Ljungdahl (WL), and methyl-CoM reductase (Mcr).

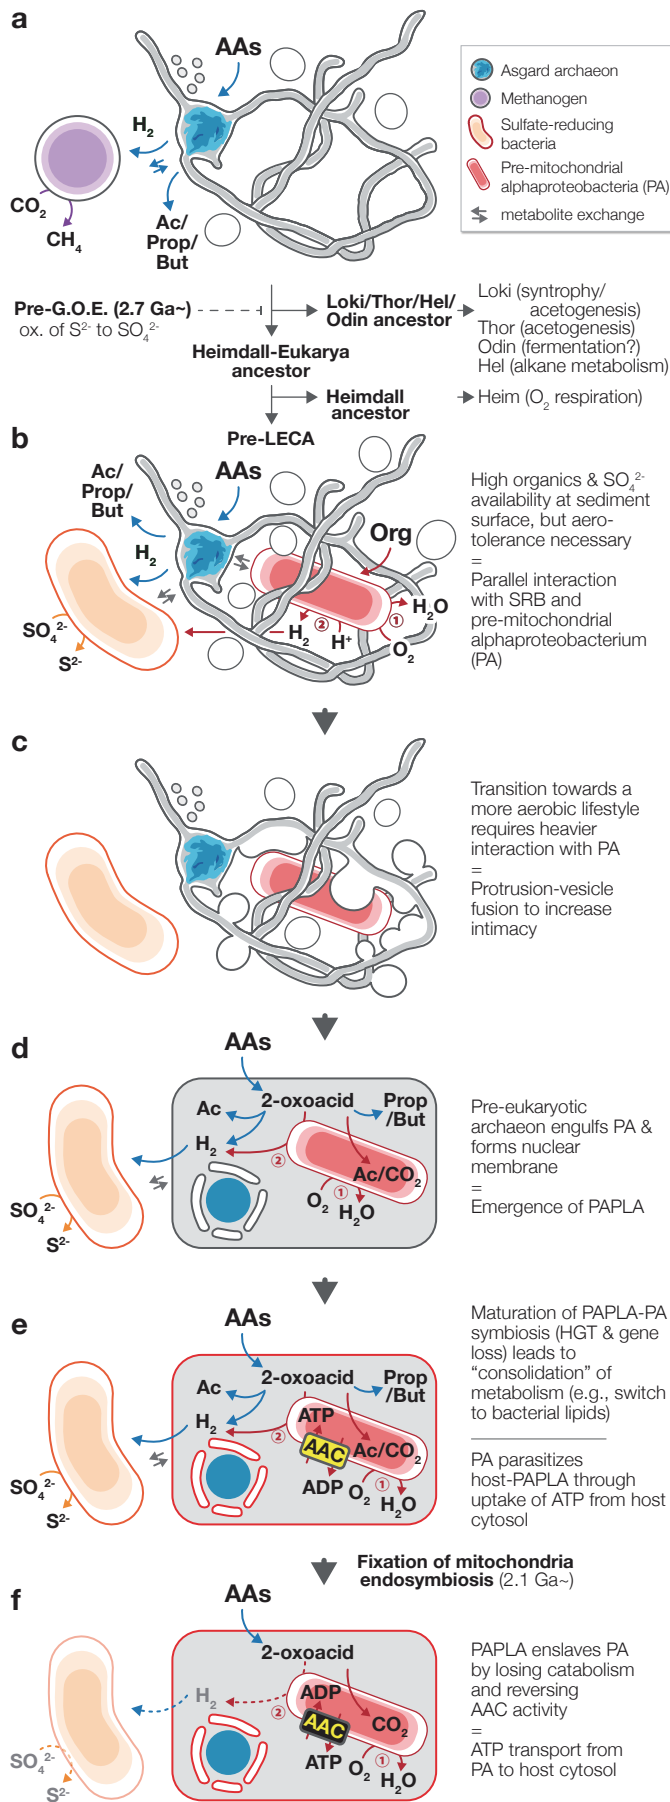

**Fig. 5 | A new evolutionary model “Entange-Engulf-Enslave (E3)” for eukaryogenesis.** **a**, Syntrophic/fermentative Asgard archaea ancestor likely degraded AAs to short-chain fatty acids and  $H_2$ . With the rising of Earth’s  $O_2$  concentrations due to oxygenic photosynthesis (around the Great Oxidation Event [G.O.E.]), Asgard archaea diverged towards specialized anaerobic niches (Lokiarchaeota [Loki], Thorarchaeota [Thor], Odinararchaeota [Odin], and Helarchaeota [Hel]) and aerobiosis (Heimdallarchaeota [Heimdall] and Eukarya). **b**, To thrive at the oxic-anoxic interface with high organic and sulfate availability, pre-LECA (last eukaryote common ancestor) archaeon syntrophically interacted with  $H_2$ -scavenging SRB (orange) and  $O_2$ -scavenging organotrophic pre-mitochondrial alphaproteobacterium (PA; red). PA could likely degrade organics (1) aerobically or (2) anaerobically in interaction with SRB. Given the restricted biosynthetic capacities of all extant Asgard archaea, the pre-LECA archaeon necessitated metabolite exchange with SRB and PA. **c**, Protrusions and MVs tangle with PA and enhance physical interaction; protrusion-MV fusion mediates further intimate interactions, and ultimately leads to PA engulfment. This mechanism for engulfment allows for formation of a nucleoid-bounding membrane topologically similar to the eukaryote nuclear membrane. **d**, After engulfment, the pre-LECA archaeon and PA can continue the interaction shown in **(b)**, leading to emergence of a PA-containing pre-LECA archaeon (PAPLA) with primitive endosymbiosis. **e**, Maturation of PAPLA-PA symbiosis and development of PA parasitism. **f**, Enslavement of PA by PAPLA through delegation of ATP generating metabolism to PA.
