# Supplementary material for: Isolation of an archaeon at the prokaryote-eukaryote interface
Source: bioRxiv or medRxiv preprint supplement (doi:10.1101/726976), 2019-08-08
Supplement: Supplementary file [file media-1.pdf]

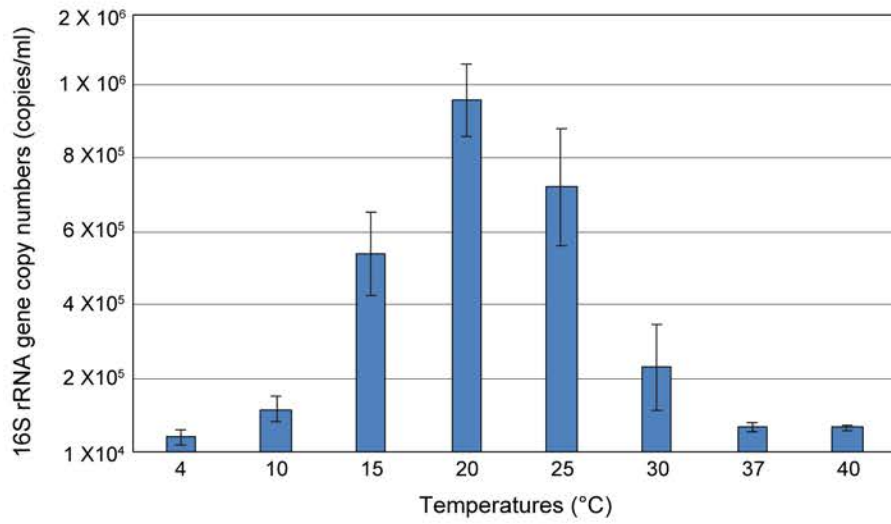

**Extended Data Fig. 1 | Effect of temperature on growth of MK-D1.** Error bars indicate standard deviations of triplicate determinations. The temperature range test was performed twice, and both results displayed similar results.

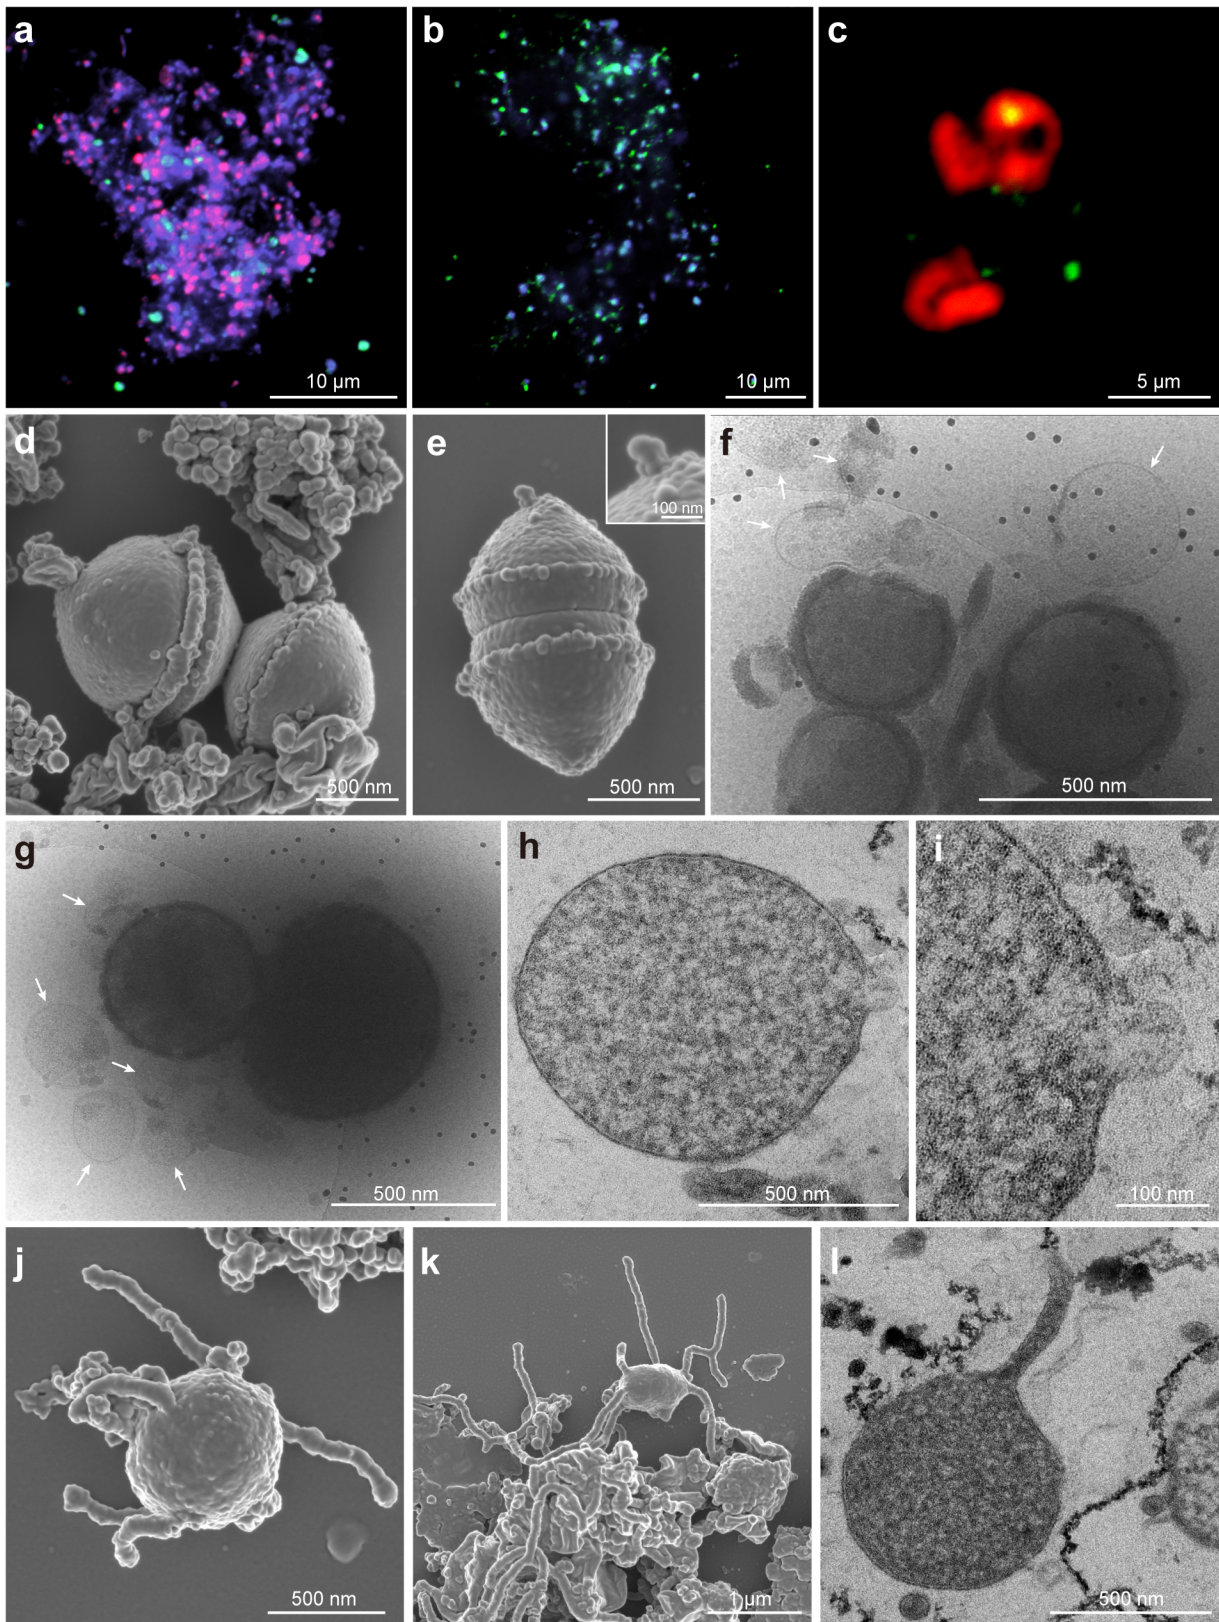

**Extended Data Fig. 2 | Other representative photomicrographs of MK-D1.** **a, b,** Fluorescence images of cells from enrichment cultures after eight (**a**) and eleven (**b**) transfers stained with DAPI (violet) and hybridized with nucleotide probes targeting MK-D1 (green) and *Bacteria* (red). The images are other fields of view, which were taken at the same time for the Figs. 1b and c images. **c,** A fluorescence image of cells in the enrichments after eleven transfers hybridized with nucleotide probes targeting MK-D1 (green) and *Archaea* (but with one mismatch against MK-D1; red). (Large and irregular coccoid-shaped cells stained by ARC915 only are likely *Methanogenium*.) **d, e,** Dividing cells of MK-D1 with a bleb. The upper-right inset image in **e** shows close-up of the bleb. **f, g,** Cryo-EM images of MK-D1 cells and large MVs (white arrows). **h, i,** Ultrathin sections of MK-D1 cells with an MV. The image **i** shows a close-up image of **h**. **j, k,** SEM images of MK-D1 cells with protrusions. **l,** Ultrathin section of a MK-D1 cell with a protrusion. Detailed iTAG analyses of cultures are shown in Supplementary Table S2.

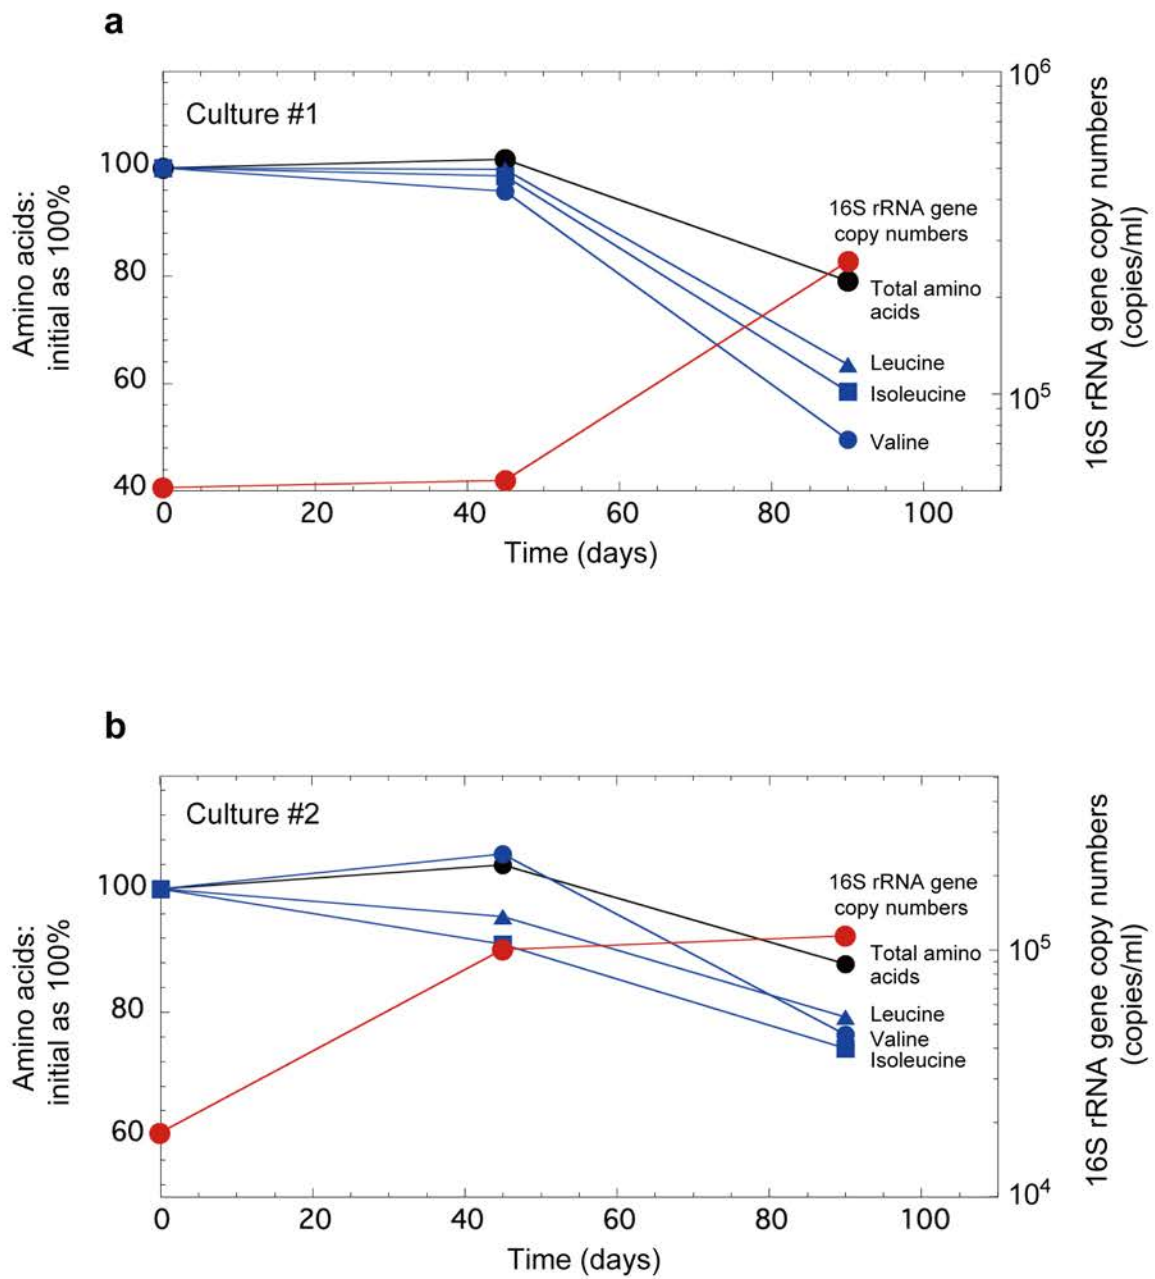

**Extended Data Fig. 3 | The amino acid concentrations and growth curves of MK-D1 in pure co-cultures. a, b,** Results from cultures #1 (a) and #2 (b) are shown. Please note that the initial concentrations of amino acids were normalized as 100%. Total amino acids and several representative amino acids (valine, leucine and isoleucine) are independently shown for the duplicate culture samples. Detailed iTAG-based community compositions of the cultures are shown in Supplementary Table S2.

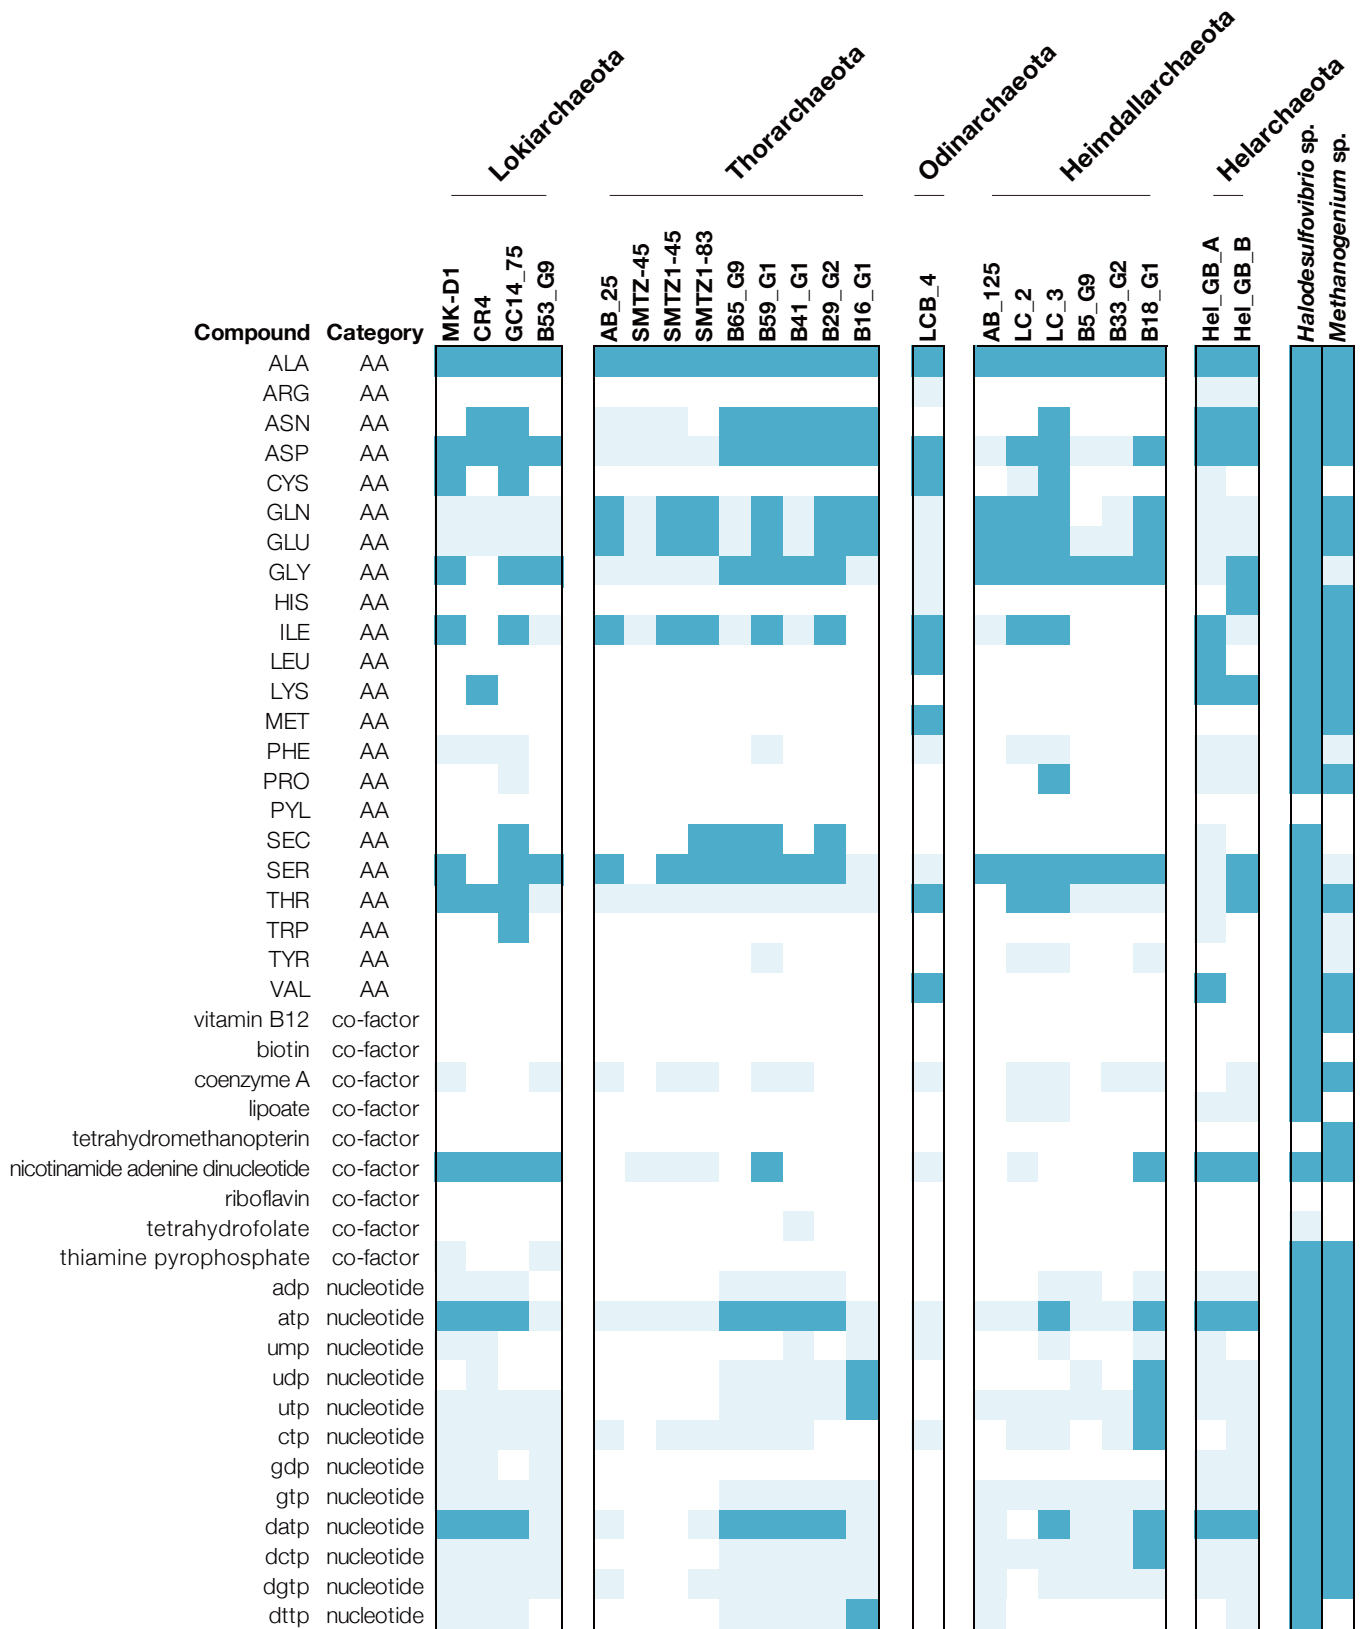

**Extended Data Fig. 4 | AA, co-factor, and nucleotide biosynthesis capacities of MK-D1 and other Asgard archaea.** Genomes encoding genes for synthesis from pyruvate or acetyl-CoA (dark blue) and synthesis from other intermediates (light blue) are indicated. Those without complete pathways for either are indicated white. *Halodesulfobrio* sp. strain MK-HDV and *Methanogenium* sp. strain MK-MG isolated in this study are also shown.

**Extended Data Table 1 | SSU rRNA gene clones obtained from the primary and six successive transferred enrichment culture**

**<Primary enrichment culture>**

**Clone library using universal primers (530F/907R)**

| Phylotype name      | No. of clones | Accession no. | Sequence length (bp) | Closest cultured species or clone (accession number)         | Sequence identity (%) | Phylogenetic affiliation                           | Identical or almost identical clones detected from the AOM bioreactor enrichment (accession number, sequence identity %) <sup>a</sup> |
|---------------------|---------------|---------------|----------------------|--------------------------------------------------------------|-----------------------|----------------------------------------------------|---------------------------------------------------------------------------------------------------------------------------------------|
| 111_U1              | 40            | LC490621      | 374                  | <i>Halodesulfobivrio aestuarii</i> strain Sylt 3 (NR_116770) | 99                    | genus <i>Halodesulfobivrio</i>                     | —                                                                                                                                     |
| 111_U2              | 3             | —             | 377                  | <i>Methylobacter marinus</i> strain A45 (NR_025132)          | 100                   | genus <i>Methylobacter</i>                         | MK903D_B19 (AB831411, 100%)                                                                                                           |
| 111_U3              | 2             | —             | 374                  | <i>Photobacterium indicum</i> strain NBRC 14233 (NR_113657)  | 100                   | genus <i>Photobacterium</i>                        | MK903D_B9 (AB831402, 100%)                                                                                                            |
| 111_U4              | 1             | LC490622      | 377                  | subseafloor sediment clone ODP1251B13.14 (AB177314)          | 99                    | subgroup 21 within the phylum <i>Acidobacteria</i> | —                                                                                                                                     |
| 111_U5 <sup>b</sup> | 1             | LC490623      | 377                  | hydrothermal seep sediment BAC_OTU_13 (KP091106)             | 100                   | GIF9 group within the class <i>Dehalococcoidia</i> | MK0D_B60 (AB831337, 99.5%)                                                                                                            |
| 111_U6              | 1             | LC490624      | 374                  | <i>Roseovarius gaetbuli</i> strain YM-20 (NR_134163)         | 99                    | genus <i>Roseovarius</i>                           | —                                                                                                                                     |

**Clone library using archaeal primers (340F/932R)**

| Phylotype name | No. of clones | Accession no. | Sequence length (bp) | Closest cultured species or clone (accession number)         | Sequence identity (%) | Phylogenetic affiliation                                 | Identical or almost identical clones detected from the AOM bioreactor enrichment (accession number, sequence identity %) <sup>a</sup> |
|----------------|---------------|---------------|----------------------|--------------------------------------------------------------|-----------------------|----------------------------------------------------------|---------------------------------------------------------------------------------------------------------------------------------------|
| 111_A1         | 6             | —             | 535                  | <i>Methanococcoides burtonii</i> strain DSM 6242 (NR_074242) | 99                    | genus <i>Methanococcoides</i>                            | MK903D_A2 (AB831282, 100%)                                                                                                            |
| 111_A2         | 5             | LC490620      | 513                  | <i>Methanogenium cariaci</i> strain JR1 (NR_104730)          | 99                    | genus <i>Methanogenium</i>                               | —                                                                                                                                     |
| 111_A3         | 2             | —             | 534                  | methane seep clone AN_5119N_arc_E4_T3 (KM356859)             | 99                    | ANME-2a                                                  | MK0D_A9 (AB831268, 100%)                                                                                                              |
| 111_A4         | 2             | LC490619      | 516                  | methane seep clone AC_5120_arc_D2_T3 (KM356804)              | 99                    | Lokiarchaeota ( <i>Ca. P. syntrophicum</i> strain MK-D1) | MK903R_A35 (AB831305, 99.0%)                                                                                                          |

**<Six successive transferred enrichment culture>**

**Clone library using universal primers (530F/907R)**

| Phylotype name | No. of clones | Accession no. | Sequence length (bp) | Closest cultured species or clone (accession number)     | Sequence identity (%) | Phylogenetic affiliation                                 | Identical or almost identical clones detected from the AOM bioreactor enrichment (accession number, sequence identity %) <sup>a</sup> |
|----------------|---------------|---------------|----------------------|----------------------------------------------------------|-----------------------|----------------------------------------------------------|---------------------------------------------------------------------------------------------------------------------------------------|
| 111-5_U1       | 40            | —             | 374                  | <i>Halodesulfobivrio oceani</i> strain I.8.1 (NR_116768) | 100                   | genus <i>Halodesulfobivrio</i>                           | —                                                                                                                                     |
| 111-5_U2       | 6             | —             | 380                  | methane seep clone AC_5120_arc_D2_T3 (KM356804)          | 100                   | Lokiarchaeota ( <i>Ca. P. syntrophicum</i> strain MK-D1) | —                                                                                                                                     |
| 111-5_U3       | 1             | —             | 380                  | <i>Methanogenium boonei</i> strain AK-7 (NR_115706)      | 99                    | genus <i>Methanogenium</i>                               | —                                                                                                                                     |

<sup>a</sup>The clone sequences have been reported in our previous study<sup>15</sup>.

<sup>b</sup>An anaerobic bacterium strain MK-GIF9, which has the identical 16S rRNA gene sequence of the OTU, has successfully been isolated from the enrichment culture (Nakahara *et al.* Cultivation of previously uncultured *Chloroflexi*, a bacterial dark matter in subseafloor biosphere. 16th International Symposium on Microbial Ecology [ISME16], Montreal, Canada [2016]). Detailed information about the cultivation, and physiological and genomic properties of the bacterium will be reported in the near future.

**Extended Data Table 2 | Carbon isotope fractionation values in MK-D1 cultures after 120 days incubation with and without stable isotope labeled amino acids**

| Culture ID                                                        | $\delta^{13}\text{C-CO}_2$ (‰ VPDB) <sup>a</sup> | $\delta^{13}\text{C-CH}_4$ (‰ VPDB) <sup>a</sup> |
|-------------------------------------------------------------------|--------------------------------------------------|--------------------------------------------------|
| <b><i>Co-cultures with Methanobacterium</i></b>                   |                                                  |                                                  |
| No.1 with stable isotope labeled AAs                              | -12.3                                            | 4094.8                                           |
| No.2 with stable isotope labeled AAs                              | -9.3                                             | 6990.7                                           |
| No.3 w/o stable isotope labeled AAs                               | -23.1                                            | -36.7                                            |
| No.4 w/o stable isotope labeled AAs                               | -23.1                                            | -33.1                                            |
| <b><i>Tri-cultures with Halodesulfobrio and Methanogenium</i></b> |                                                  |                                                  |
| No.5 with stable isotope labeled AAs                              | 318.5                                            | 86.0                                             |
| No.6 with stable isotope labeled AAs                              | 309.3                                            | 87.8                                             |
| No.7 w/o stable isotope labeled AAs                               | -22.6                                            | -95.5                                            |
| No.8 w/o stable isotope labeled AAs                               | -22.8                                            | -97.8                                            |

<sup>a</sup>‰ versus the Vienna Pee Dee Belemnite.

Extended Data Table 3 | Growth of *Ca. P. syntrophicum* strain MK-D1 for 120 days incubation with a range of substrates

| Culture name    | Substrate                                                                                                      | Initial MK-D1 16S rRNA gene copies per ml of culture | Final MK-D1 16S rRNA gene copies per ml of culture | No. of MK-D1 16S rRNA gene copies relative to initial culture | Community compositions evaluated by iTAG analysis (%) <sup>g</sup> |                          |                                           |              |
|-----------------|----------------------------------------------------------------------------------------------------------------|------------------------------------------------------|----------------------------------------------------|---------------------------------------------------------------|--------------------------------------------------------------------|--------------------------|-------------------------------------------|--------------|
|                 |                                                                                                                |                                                      |                                                    |                                                               | MK-D1                                                              | <i>Methanogenium</i> sp. | <i>Methanobacterium</i> sp. strain MO-MB1 | Others       |
| Inoculum        | Casamino acids (CA) <sup>b</sup> + 20 amino acids mixture (AAs) <sup>c</sup> + powdered milk (PM) <sup>d</sup> | —                                                    | 5.91E+05                                           | —                                                             | 39.8                                                               | 36.8                     | 23.3                                      | 0.01         |
| Control-1       | CA + 20 AAs + PM                                                                                               | 1.42E+04                                             | 1.62E+05                                           | 11.36                                                         | 76.7                                                               | 21.8                     | 1.4                                       | 0.03         |
| Control-2       | CA + 20 AAs + PM                                                                                               | 4.67E+03                                             | 6.55E+04                                           | 14.03                                                         | 60.3                                                               | 38.0                     | 1.6                                       | 0.04         |
| H2-1            | CA + 20 AAs + PM + 1.5 kPa H <sub>2</sub> <sup>e</sup> + 10 mM 2-bromoethane sulfonate (2-BES) <sup>f</sup>    | 9.46E+03                                             | 4.35E+03                                           | 0.46                                                          | —                                                                  | —                        | —                                         | —            |
| H2-2            | CA + 20 AAs + PM + 1.5 kPa H <sub>2</sub> + 10 mM 2-BES                                                        | 1.37E+04                                             | 3.28E+03                                           | 0.24                                                          | —                                                                  | —                        | —                                         | —            |
| H2-3            | CA + 20 AAs + PM + 1.5 kPa H <sub>2</sub> + 10 mM 2-BES                                                        | 3.10E+04                                             | 8.27E+03                                           | 0.27                                                          | —                                                                  | —                        | —                                         | —            |
| Formate-1       | CA + 20 AAs + PM + 1 mM Formate + 10 mM 2-BES                                                                  | 2.76E+04                                             | 2.00E+03                                           | 0.07                                                          | —                                                                  | —                        | —                                         | —            |
| Formate-2       | CA + 20 AAs + PM + 1 mM Formate + 10 mM 2-BES                                                                  | 1.46E+04                                             | 9.49E+03                                           | 0.65                                                          | —                                                                  | —                        | —                                         | —            |
| Nitrate-1       | CA + 20 AAs + PM + 500 μM Nitrate <sup>g</sup>                                                                 | 2.13E+04                                             | 8.43E+03                                           | 0.40                                                          | —                                                                  | —                        | —                                         | —            |
| Nitrate-2       | CA + 20 AAs + PM + 500 μM Nitrate                                                                              | 1.47E+04                                             | 5.19E+03                                           | 0.35                                                          | —                                                                  | —                        | —                                         | —            |
| Sulfate-1       | CA + 20 AAs + PM + 500 μM Sulfate                                                                              | 5.28E+03                                             | 9.21E+04                                           | 17.42                                                         | 79.5                                                               | 19.5                     | 1.0                                       | 0.03         |
| Sulfate-2       | CA + 20 AAs + PM + 500 μM Sulfate                                                                              | 3.39E+04                                             | 5.28E+04                                           | 1.56                                                          | —                                                                  | —                        | —                                         | —            |
| Thiosulfate-1   | CA + 20 AAs + PM + 500 μM Thiosulfate                                                                          | 1.23E+04                                             | 5.00E+04                                           | 4.05                                                          | —                                                                  | —                        | —                                         | —            |
| Thiosulfate-2   | CA + 20 AAs + PM + 500 μM Thiosulfate                                                                          | 2.29E+04                                             | 6.09E+04                                           | 2.66                                                          | —                                                                  | —                        | —                                         | —            |
| Lactate-1       | CA + 20 AAs + PM + 1 mM Lactate                                                                                | 5.31E+03                                             | 1.31E+04                                           | 2.46                                                          | —                                                                  | —                        | —                                         | —            |
| Lactate-2       | CA + 20 AAs + PM + 1 mM Lactate                                                                                | 1.53E+04                                             | 1.91E+04                                           | 1.25                                                          | —                                                                  | —                        | —                                         | —            |
| Acetate-1       | CA + 20 AAs + PM + 1 mM Acetate                                                                                | 2.63E+04                                             | 9.17E+04                                           | 3.48                                                          | —                                                                  | —                        | —                                         | —            |
| Acetate-2       | CA + 20 AAs + PM + 1 mM Acetate                                                                                | 1.56E+04                                             | 2.13E+04                                           | 1.36                                                          | —                                                                  | —                        | —                                         | —            |
| Glucose-1       | CA + 20 AAs + PM + 1 mM Glucose                                                                                | 1.12E+04                                             | 1.16E+05                                           | 10.33                                                         | 73.8                                                               | 24.3                     | 1.9                                       | 0.03         |
| Glucose-2       | CA + 20 AAs + PM + 1 mM Glucose                                                                                | 1.06E+04                                             | 1.06E+05                                           | 10.01                                                         | 70.3                                                               | 28.0                     | 1.7                                       | Not detected |
| Fructose-1      | CA + 20 AAs + PM + 1 mM Fructose                                                                               | 3.18E+04                                             | 3.31E+04                                           | 1.04                                                          | —                                                                  | —                        | —                                         | —            |
| Fructose-2      | CA + 20 AAs + PM + 1 mM Fructose                                                                               | 1.79E+04                                             | 1.44E+05                                           | 8.08                                                          | —                                                                  | —                        | —                                         | —            |
| Xylose-1        | CA + 20 AAs + PM + 1 mM Xylose                                                                                 | 2.82E+04                                             | 6.79E+03                                           | 0.24                                                          | —                                                                  | —                        | —                                         | —            |
| Xylose-2        | CA + 20 AAs + PM + 1 mM Xylose                                                                                 | 9.25E+03                                             | 1.18E+05                                           | 12.73                                                         | 61.4                                                               | 36.5                     | 2.1                                       | 0.01         |
| Ribose-1        | CA + 20 AAs + PM + 1 mM Ribose                                                                                 | 1.42E+04                                             | 2.88E+04                                           | 2.02                                                          | —                                                                  | —                        | —                                         | —            |
| Ribose-2        | CA + 20 AAs + PM + 1 mM Ribose                                                                                 | 7.34E+03                                             | 2.29E+04                                           | 3.13                                                          | —                                                                  | —                        | —                                         | —            |
| Maltose-1       | CA + 20 AAs + PM + 1 mM Maltose                                                                                | 2.84E+04                                             | 1.21E+05                                           | 4.25                                                          | —                                                                  | —                        | —                                         | —            |
| Maltose-2       | CA + 20 AAs + PM + 1 mM Maltose                                                                                | 2.17E+04                                             | 4.55E+04                                           | 2.09                                                          | —                                                                  | —                        | —                                         | —            |
| Citrate-1       | CA + 20 AAs + PM + 1 mM Citrate                                                                                | 3.36E+04                                             | 1.20E+05                                           | 3.56                                                          | —                                                                  | —                        | —                                         | —            |
| Citrate-2       | CA + 20 AAs + PM + 1 mM Citrate                                                                                | 1.82E+04                                             | 5.73E+04                                           | 3.15                                                          | —                                                                  | —                        | —                                         | —            |
| Pyruvate-1      | CA + 20 AAs + PM + 1 mM Pyruvate                                                                               | 1.73E+04                                             | 9.37E+04                                           | 5.42                                                          | —                                                                  | —                        | —                                         | —            |
| Pyruvate-2      | CA + 20 AAs + PM + 1 mM Pyruvate                                                                               | 2.22E+04                                             | 4.86E+03                                           | 0.22                                                          | —                                                                  | —                        | —                                         | —            |
| Fumarate-1      | CA + 20 AAs + PM + 1 mM Fumarate                                                                               | 3.16E+04                                             | 7.20E+04                                           | 2.28                                                          | —                                                                  | —                        | —                                         | —            |
| Fumarate-2      | CA + 20 AAs + PM + 1 mM Fumarate                                                                               | 1.94E+04                                             | 2.35E+04                                           | 1.21                                                          | —                                                                  | —                        | —                                         | —            |
| Archaeal cell-1 | CA + 20 AAs + PM + archaeal cell membrane components <sup>h</sup>                                              | 1.53E+04                                             | 1.42E+05                                           | 9.27                                                          | 81.5                                                               | 17.5                     | 0.8                                       | 0.3          |
| Archaeal cell-2 | CA + 20 AAs + PM + archaeal cell membrane components                                                           | 4.17E+04                                             | 1.05E+05                                           | 2.52                                                          | —                                                                  | —                        | —                                         | —            |

A dash indicates that data were not taken for that sample.

<sup>a</sup>The iTAG analysis was performed on the samples in which an increase of 16S rRNA gene copy numbers of MK-D1 about 10 times or more after incubation was observed by the qPCR assay. The detailed results are shown in Supplementary Table S2.

<sup>b</sup>Final concentration of Casamino acids was 0.05% (w/v).

<sup>c</sup>Final concentration of each amino acid was 0.1 mM.

<sup>d</sup>A powdered milk for baby (Hohomei, Meiji Co., Ltd., Tokyo, Japan) was used at a final concentration of 0.1% (w/v).

<sup>e</sup>The concentration of hydrogen gas was in the head space of the culture bottle.

<sup>f</sup>2-BES was added to inhibit methanogens.

<sup>g</sup>Addition of nitrate completely suppressed growth of the *Ca. P. syntrophicum*. This is probably because nitrate inhibited formate dehydrogenase activity of *Ca. P. syntrophicum*<sup>78</sup>.

<sup>h</sup>Archaeal cell membrane components were mixture of phytol, intact polar lipid (IPL)-glycerol-dialkyl-glycerol tetraethers (GDGTs), and core lipid (CL)-GDGTs (each at a final concentration 50 ng/ml). The reason for using the archaeal membrane components is that these have positive effect on the growth for some archaeal species: (i) archaeal cell extract including membrane lipids stimulates growth of an extremely thermophilic archaeon *Thermocodium modestius*<sup>79</sup>, and (ii) a hyperthermophilic archaeon *Thermoillum pedes* requires the polar lipids for the growth, which was obtained from an archaeal species of *Thermoproteus tenax*<sup>80</sup>.
